# Supplementary material for: MYC functions as a switch for natural killer cell-mediated immune surveillance of lymphoid malignancies
Source: PubMed Central journal article supplement (PMC7275060; doi:10.1038/s41467-020-16447-7), 2020-06-05
Supplement: 41467_2020_16447_MOESM1_ESM.pdf [file 41467_2020_16447_MOESM1_ESM.pdf]

## **Supplementary Materials (Swaminathan *et al.*)**

### **MYC Functions as a Switch for Natural Killer Cell-Mediated Immune Surveillance of Lymphoid Malignancies**

#### **Inventory**

- Supplementary Figures S1-S31
- Supplementary Tables S1-S6

**Supplementary Figure 1: MYC-driven lymphomas exhibit disrupted splenic architectures**

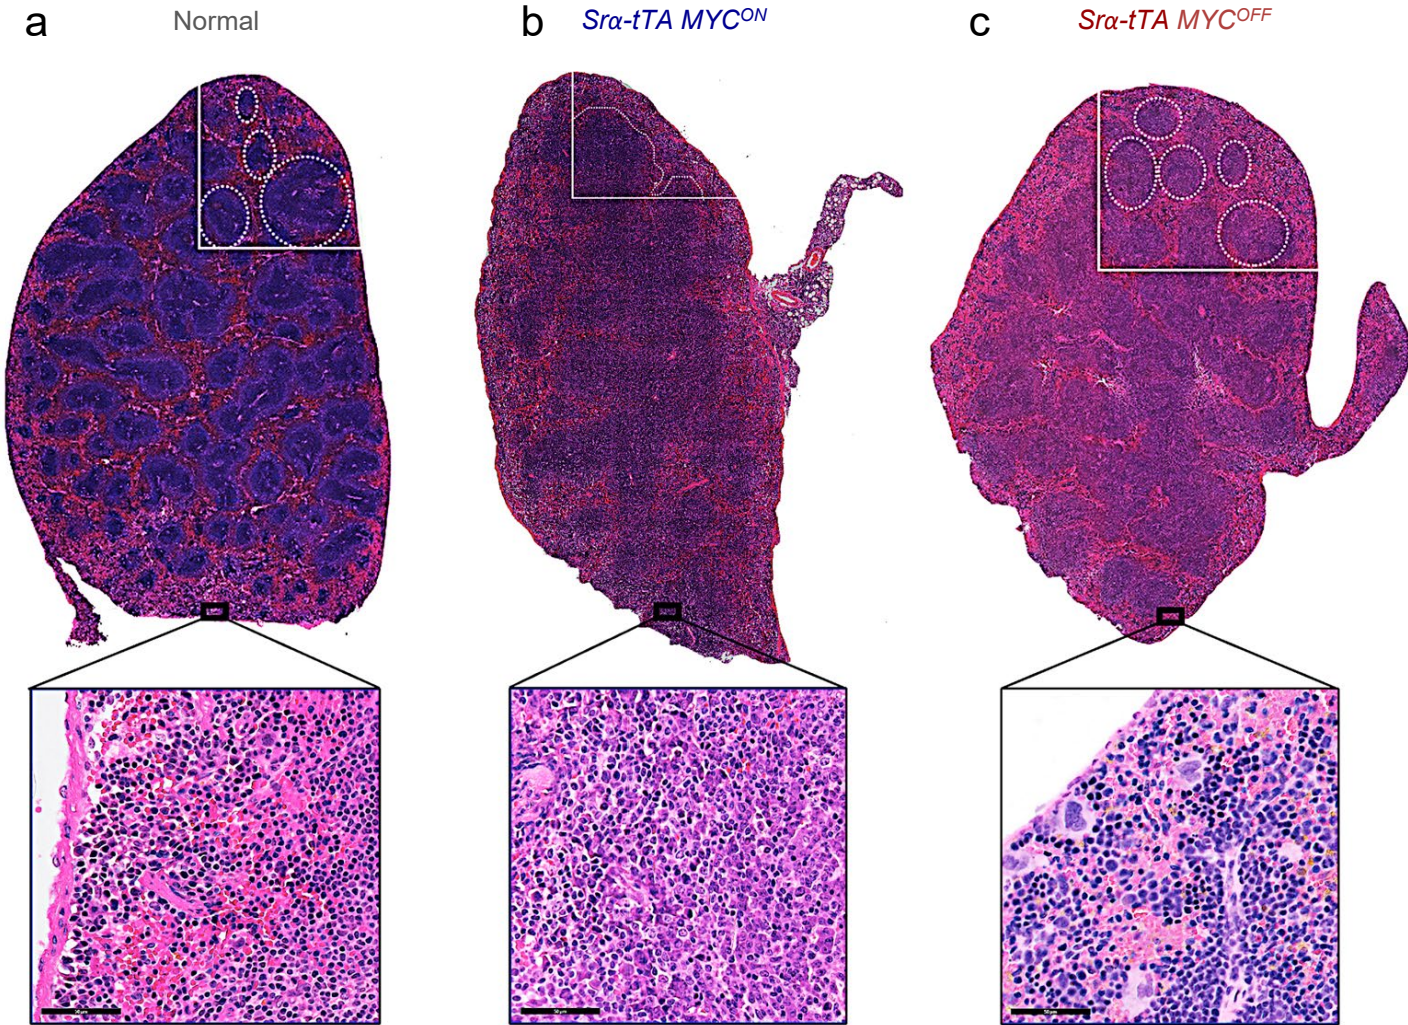

**Supplementary Figure 1: MYC-driven lymphomas exhibit disrupted splenic architectures.** Hematoxylin and Eosin (H&E) staining of spleens isolated from age and sex matched healthy normal (n = 3, **a**), *Sra-tTA MYC<sup>ON</sup>* (n = 3, **b**) and *Sra-tTA MYC<sup>OFF</sup>* (doxycycline 96 h, n = 3, **c**) mice. White dotted circles depict an intact germinal center in healthy and *Sra-tTA MYC<sup>OFF</sup>* mice. Magnification (top) = 4X, Inset (bottom): Magnification = 20X, Scale bars = 50  $\mu$ m.

**Supplementary Figure 2: Oncogenic MYC perturbs the relative compositions of splenic immune subsets**

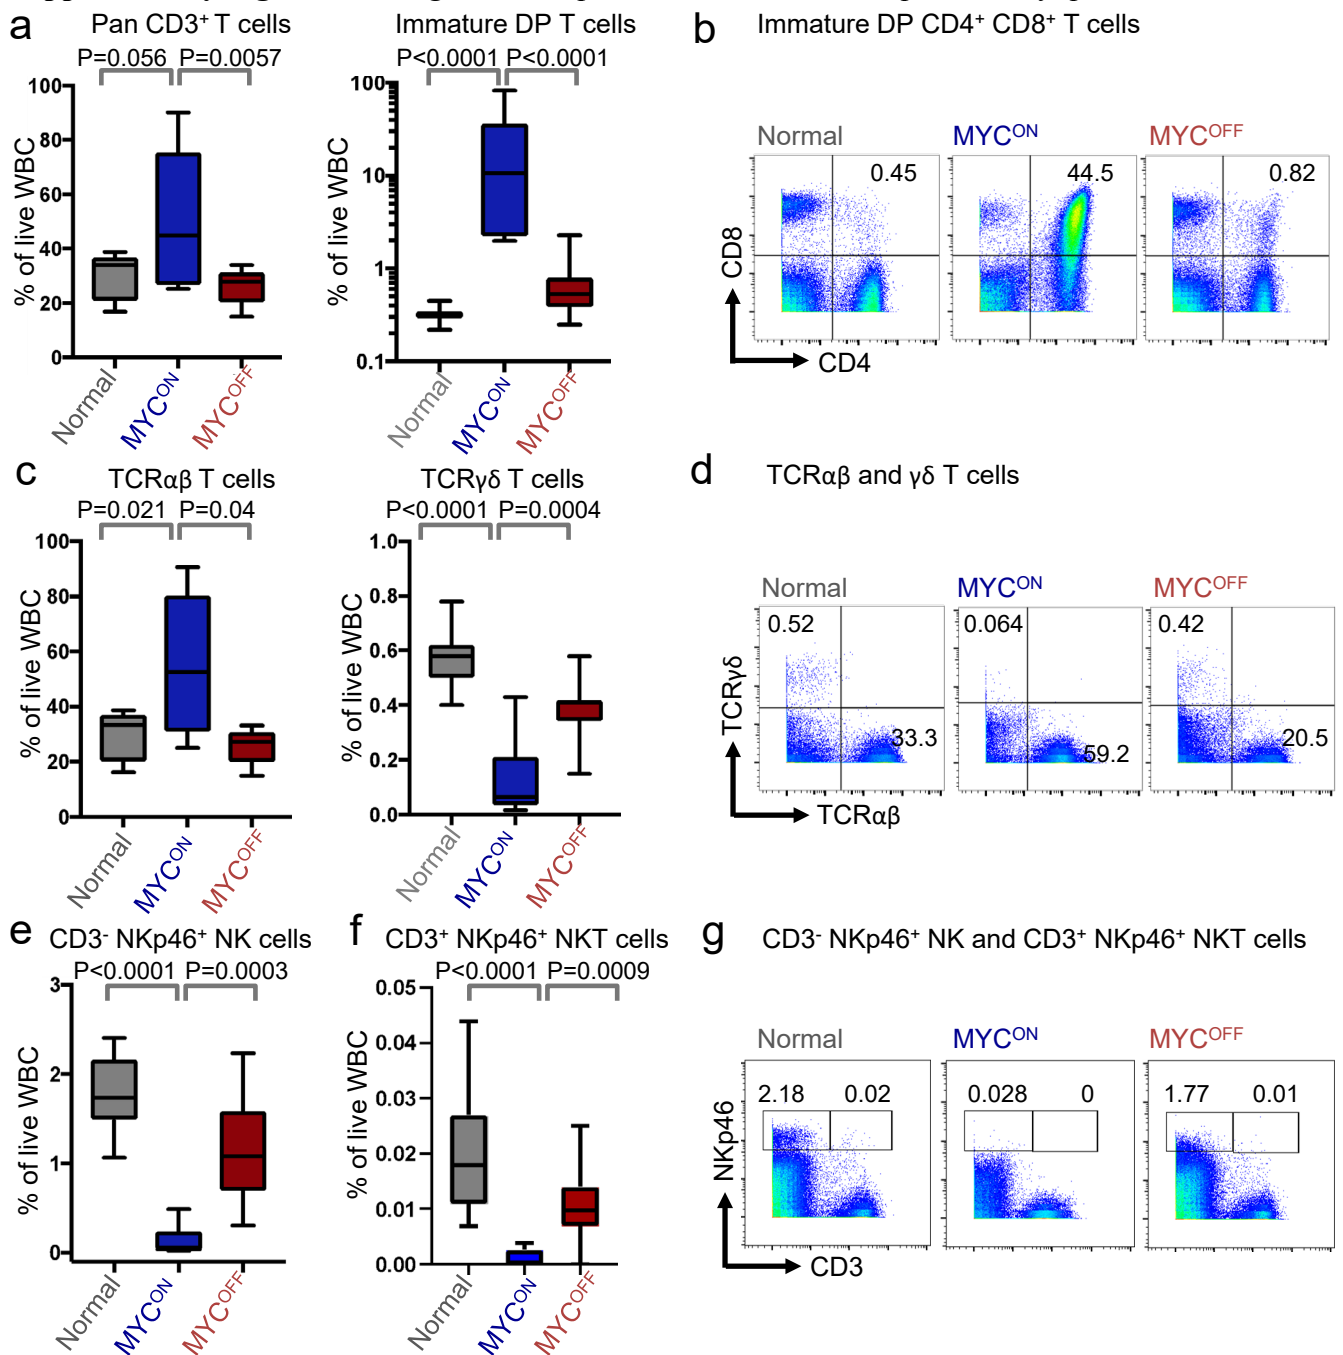

**Supplementary Figure 2: Oncogenic MYC perturbs the relative compositions of splenic immune subsets.** (a) Quantification of CD3<sup>+</sup> T and CD4<sup>+</sup> CD8<sup>+</sup> immature DP T cell percentages in normal (n = 11), *SRα-tTA MYC<sup>CON</sup>* (n = 9), and *SRα-tTA MYC<sup>OFF</sup>* (doxycycline 96 h, n = 10) mice by CyTOF. (b) Representative CyTOF dot plots showing percentages of DP T cells in spleen from normal, *SRα-tTA MYC<sup>CON</sup>*, and *SRα-tTA MYC<sup>OFF</sup>* mice. (c) Quantification of TCRαβ<sup>+</sup> and TCRγδ<sup>+</sup> T cell percentages in normal, *SRα-tTA MYC<sup>CON</sup>*, and *SRα-tTA MYC<sup>OFF</sup>* mice. (d) Representative CyTOF dot plots showing percentages of TCRαβ and TCRγδ T cells in spleen from normal, *SRα-tTA MYC<sup>CON</sup>*, and *SRα-tTA MYC<sup>OFF</sup>* mice. (e) Quantification of NK cell percentages in normal, *SRα-tTA MYC<sup>CON</sup>*, and *SRα-tTA MYC<sup>OFF</sup>* mice. (f) Quantification of NKT cell percentages in normal, *SRα-tTA MYC<sup>CON</sup>*, and *SRα-tTA MYC<sup>OFF</sup>* mice. (g) Representative CyTOF dot plots showing NK and NKT cell percentages in spleen from normal, *SRα-tTA MYC<sup>CON</sup>*, and *SRα-tTA MYC<sup>OFF</sup>* mice. Two-sided p values were calculated using the Mann-Whitney test. For all box plots, center is at the median, minima and maxima are indicated by whiskers, and the box represents data between the 25<sup>th</sup> and 75<sup>th</sup> percentile.

**Supplementary Figure 3: Oncogenic MYC perturbs the relative compositions of splenic immune subsets**

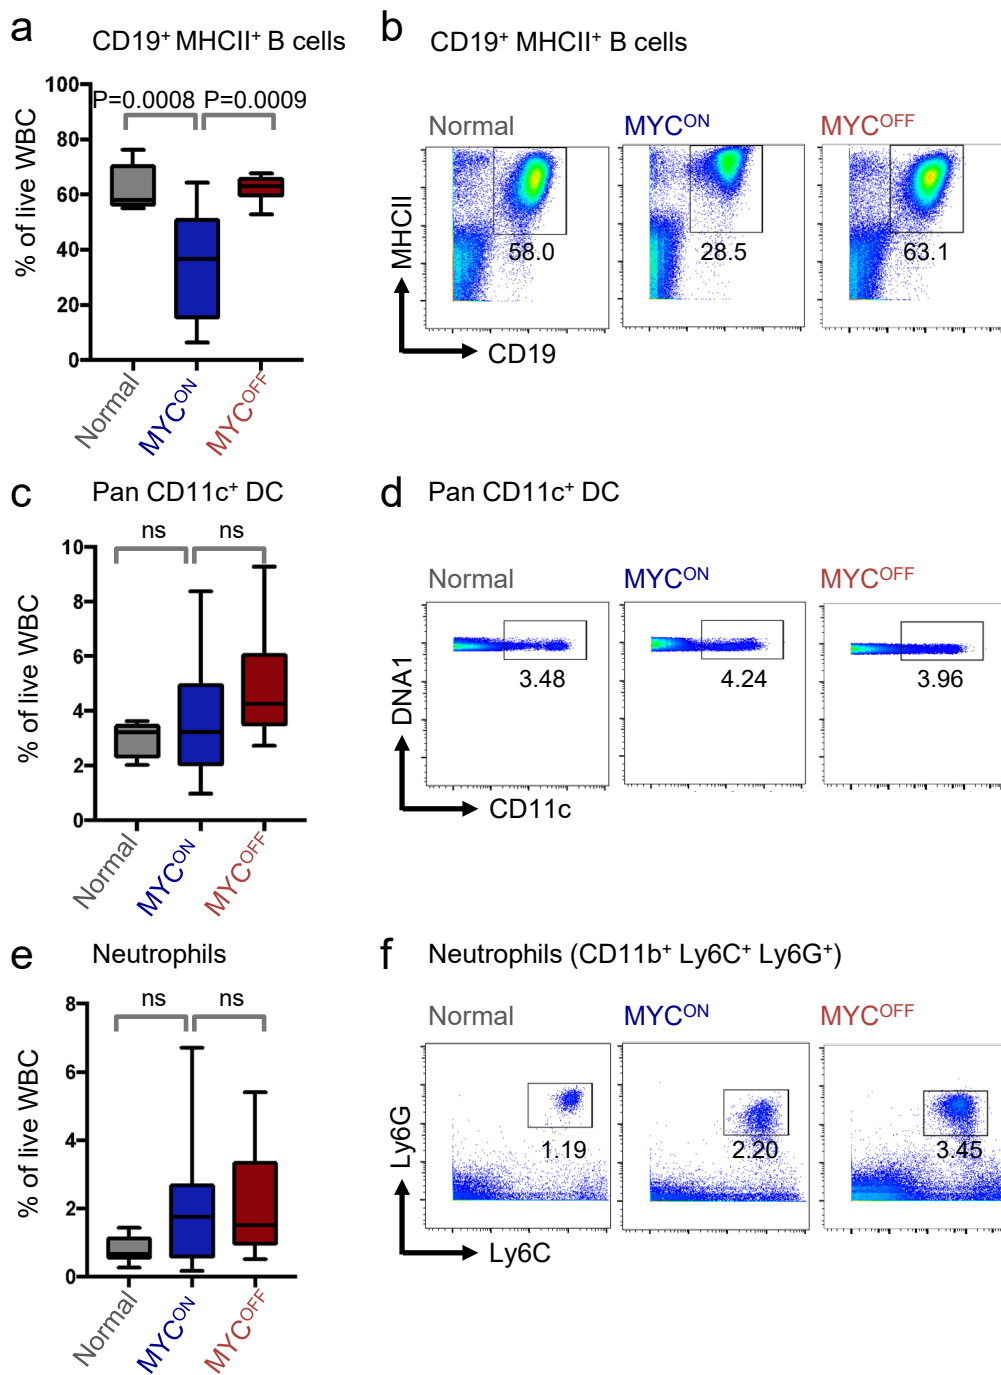

**Supplementary Figure 3: Oncogenic MYC perturbs the relative compositions of splenic immune subsets.** (a) Quantification of CD11c<sup>+</sup> DCs in normal (n = 11), *SRA-tTA MYC<sup>ON</sup>* (n = 9), and *SRA-tTA MYC<sup>OFF</sup>* (doxycycline 96 h, n = 10) mice by CyTOF. (b) CyTOF dot plots showing percentages of DCs in one representative spleen from normal, *SRA-tTA MYC<sup>ON</sup>*, and *SRA-tTA MYC<sup>OFF</sup>* mice. (c) Quantification of neutrophil percentages in normal, *SRA-tTA MYC<sup>ON</sup>*, and *SRA-tTA MYC<sup>OFF</sup>* mice. (d) CyTOF dot plots showing percentages of neutrophils in one representative spleen from normal, *SRA-tTA MYC<sup>ON</sup>*, and *SRA-tTA MYC<sup>OFF</sup>* mice. (e) Quantification of B cell percentages in normal, *SRA-tTA MYC<sup>ON</sup>*, and *SRA-tTA MYC<sup>OFF</sup>* mice. (f) CyTOF dot plots showing B cell percentages in one representative spleen from normal, *SRA-tTA MYC<sup>ON</sup>*, and *SRA-tTA MYC<sup>OFF</sup>* mice. All populations have been gated on live intact singlets. Two-sided p values were calculated using the Mann-Whitney test (ns = not significant). For all box plots, center is at the median, minima and maxima are indicated by whiskers, and the box represents data between the 25<sup>th</sup> and 75<sup>th</sup> percentile.

**Supplementary Figure 4:** *Changes in absolute numbers of splenic immune subsets during MYC-driven lymphomagenesis*

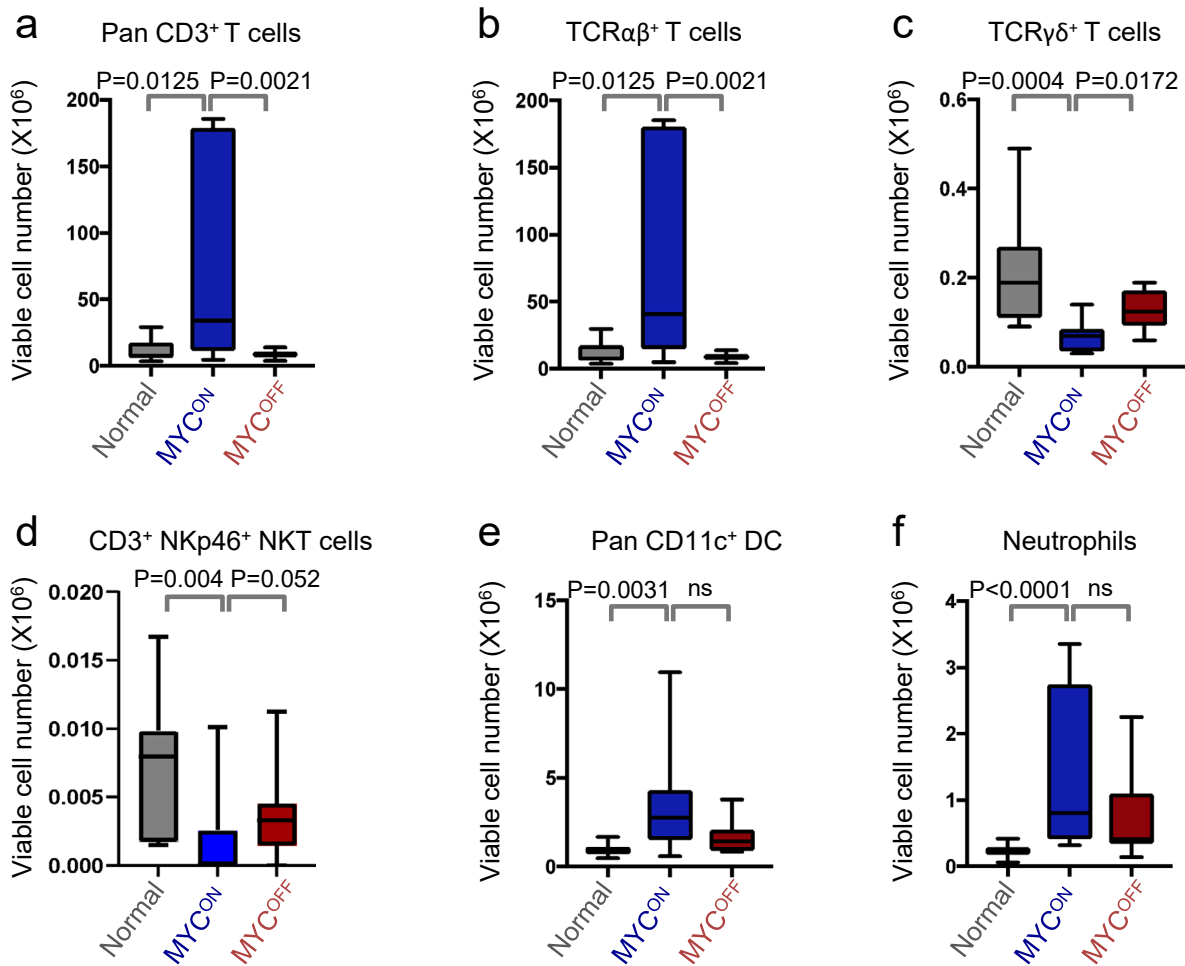

**Supplementary Figure 4: Changes in absolute numbers of splenic immune subsets during MYC-driven lymphomagenesis.** (a-f) Quantification of absolute cell numbers of pan CD3<sup>+</sup> T cells (a), TCRαβ<sup>+</sup> T cells (b), TCRγδ<sup>+</sup> T cells (c), CD3<sup>+</sup> NKp46<sup>+</sup> NKT cells (d), pan CD11c<sup>+</sup> DC (e), and neutrophils (f), in spleens of normal (n = 11), *SRα-tTA MYC<sup>ON</sup>* (n = 9), and *SRα-tTA MYC<sup>OFF</sup>* (doxycycline 96 h, n = 10) mice subjected to mass cytometry. Two-sided p values were calculated using the Mann-Whitney test (ns = not significant). For all box plots, center is at the median, minima and maxima are indicated by whiskers, and the box represents data between the 25<sup>th</sup> and 75<sup>th</sup> percentile.



**Supplementary Figure 5:** Alterations of splenic NK compositions in MYC-driven T cell lymphoma verified by flow cytometry

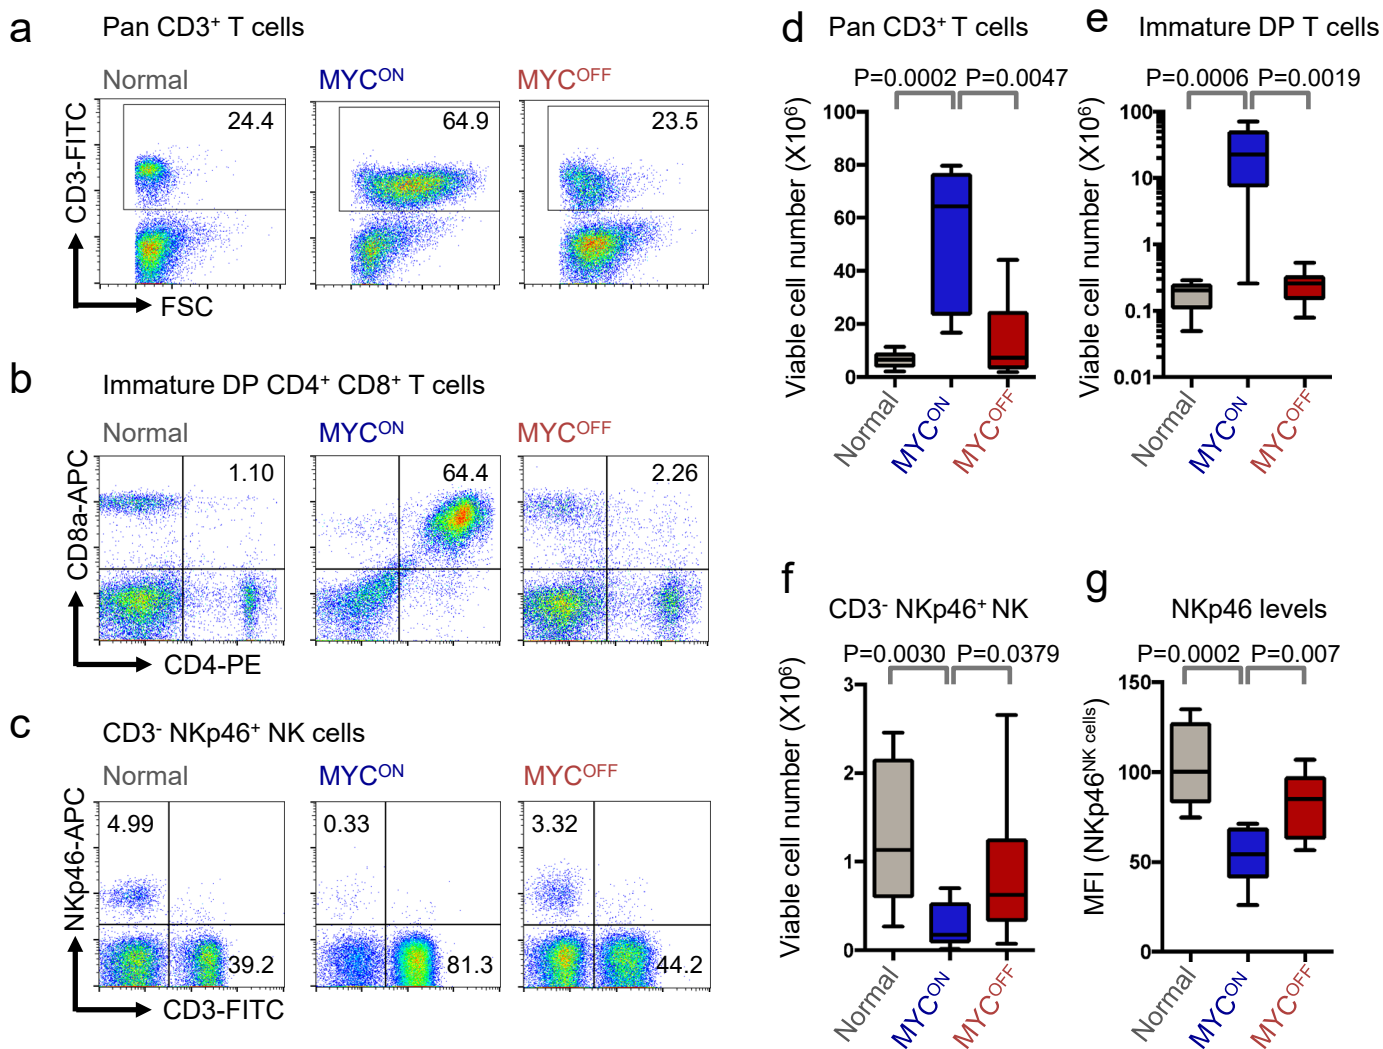

**Supplementary Figure 5: Alterations of splenic NK compositions in MYC-driven T cell lymphoma.** (a-c) Representative flow cytometry plots depicting splenic pan CD3<sup>+</sup> T cell (a), CD4<sup>+</sup> CD8<sup>+</sup> DP T cells (b), and CD3<sup>-</sup> NKp46<sup>+</sup> NK cell (c), distributions in normal (n = 8), *SRα-tTA MYC<sup>ON</sup>* (n = 8), and *SRα-tTA MYC<sup>OFF</sup>* (doxycycline 96 h, n = 8) mice. (d-f) Quantification of numbers of pan CD3<sup>+</sup> T cells (d), and immature DP T cell (e), and CD3<sup>-</sup> NKp46<sup>+</sup> NK cells (f) in normal (n = 8), *SRα-tTA MYC<sup>ON</sup>* (n = 8), and *SRα-tTA MYC<sup>OFF</sup>* (n = 8) spleens by flow cytometry. (g) MFI of surface NKp46 in splenic NK cells from normal (n = 8), *SRα-tTA MYC<sup>ON</sup>* (n = 8), and *SRα-tTA MYC<sup>OFF</sup>* (n = 8) mice. All populations are depicted as percentages of live cells (FSC<sup>+</sup> PI<sup>-</sup>). Two-sided p values were calculated using the Mann-Whitney test (ns = not significant). For all box plots, center is at the median, minima and maxima are indicated by whiskers, and the box represents data between the 25<sup>th</sup> and 75<sup>th</sup> percentile.

**Supplementary Figure 6:** *CIBERSORT* measuring changes in splenic NK composition during murine MYC-driven T cell lymphomagenesis

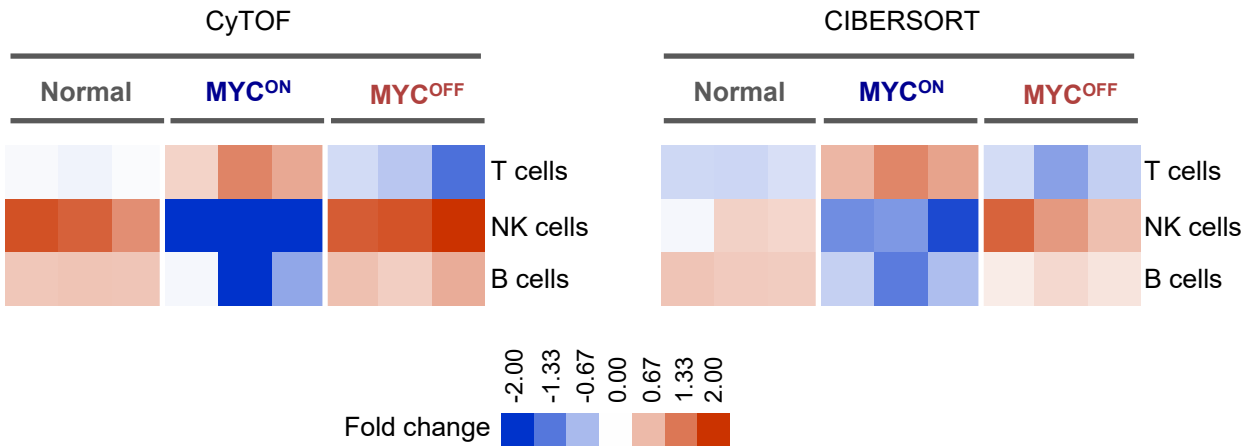

**Supplementary Figure 6: CIBERSORT measuring changes in splenic NK composition during murine MYC-driven T cell lymphomagenesis.** Heatmap comparing fold changes in T, B and NK immune subsets in normal (n = 3), *SR $\alpha$ -tTA MYC<sup>ON</sup>* (n = 3), and *SR $\alpha$ -tTA MYC<sup>OFF</sup>* (n = 3) mice by CyTOF (left) and CIBERSORT (right).

**Supplementary Figure 7: Suppression of bone marrow NK cells during MYC-driven lymphomagenesis**

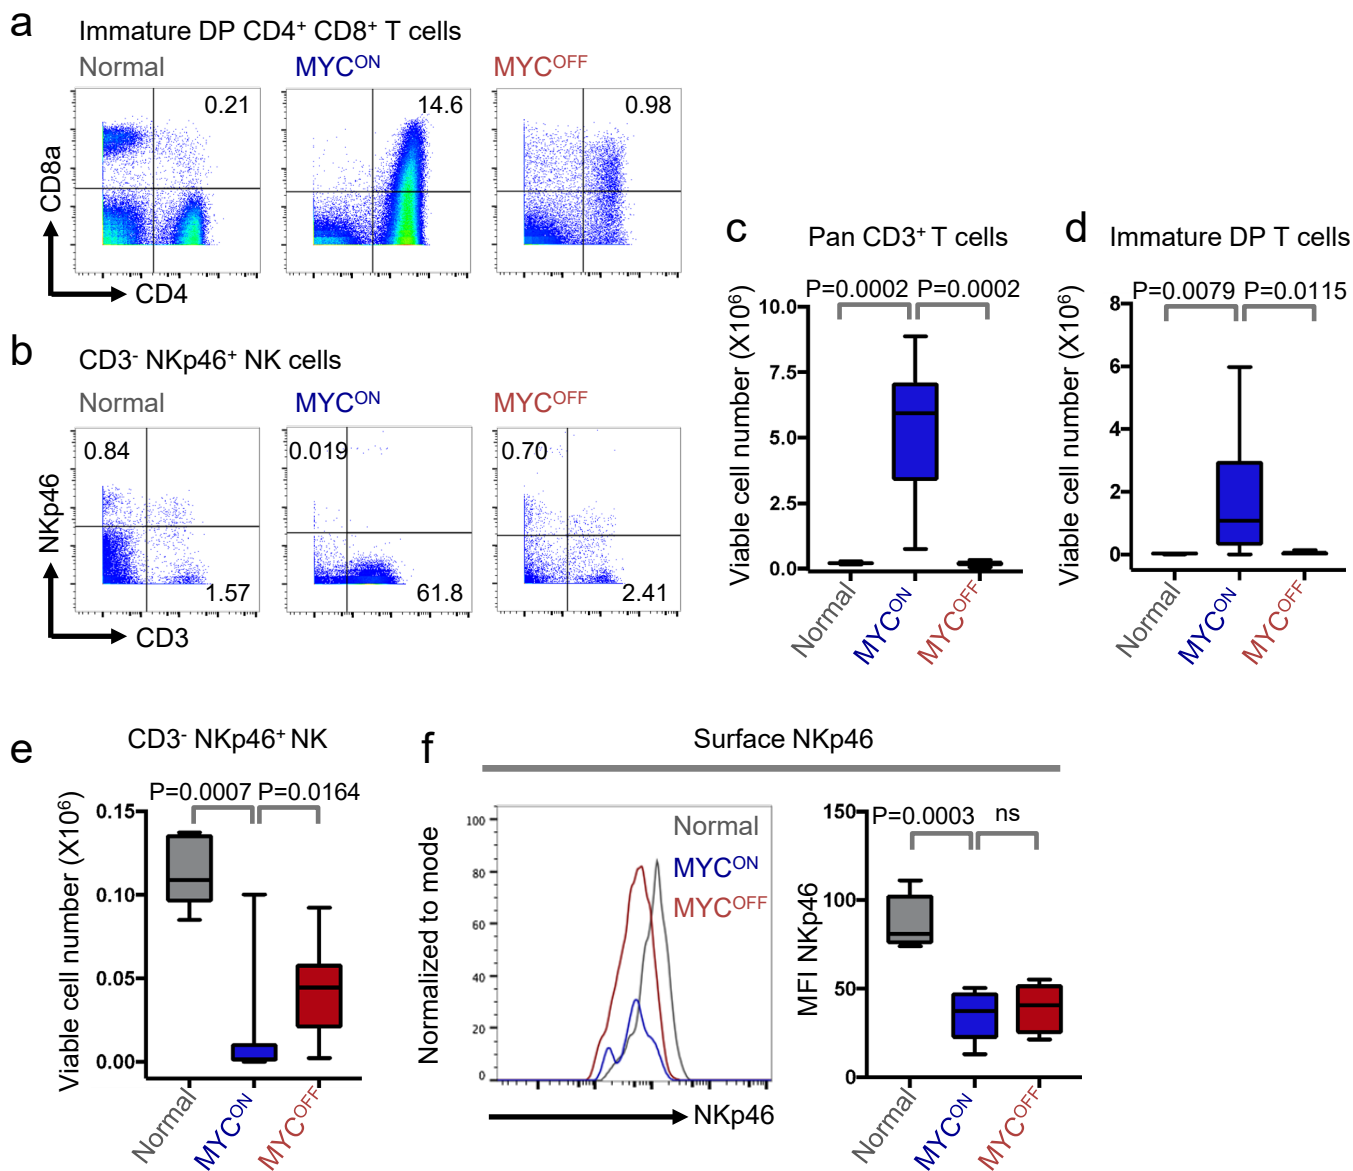

**Supplementary Figure 7: Suppression of bone marrow NK cells during MYC-driven lymphomagenesis.** (a-b) Representative CyTOF plots depicting T and NK cell distributions in normal (n = 7), *SR $\alpha$ -tTA MYC<sup>ON</sup>* (n = 9), and *SR $\alpha$ -tTA MYC<sup>OFF</sup>* (doxycycline 96 h, n = 7) bone marrows. (c-e) Quantification of absolute numbers of pan CD3<sup>+</sup> T cells (c), immature DP T cells (d), and NK cells (e) in bone marrows of normal, *SR $\alpha$ -tTA MYC<sup>ON</sup>*, and *SR $\alpha$ -tTA MYC<sup>OFF</sup>* mice. (f) Representative MFI of surface NKp46 in bone marrow NK cells from normal, *SR $\alpha$ -tTA MYC<sup>ON</sup>*, and *SR $\alpha$ -tTA MYC<sup>OFF</sup>* mice. All populations are depicted as percentages of live intact singlets. Two-sided p values were calculated using the Mann-Whitney test (ns = not significant). For all box plots, center is at the median, minima and maxima are indicated by whiskers, and the box represents data between the 25<sup>th</sup> and 75<sup>th</sup> percentile.



**Supplementary Figure 8:** *Increased cell death is not responsible for reduction of NK cells in MYC-driven lymphomas*

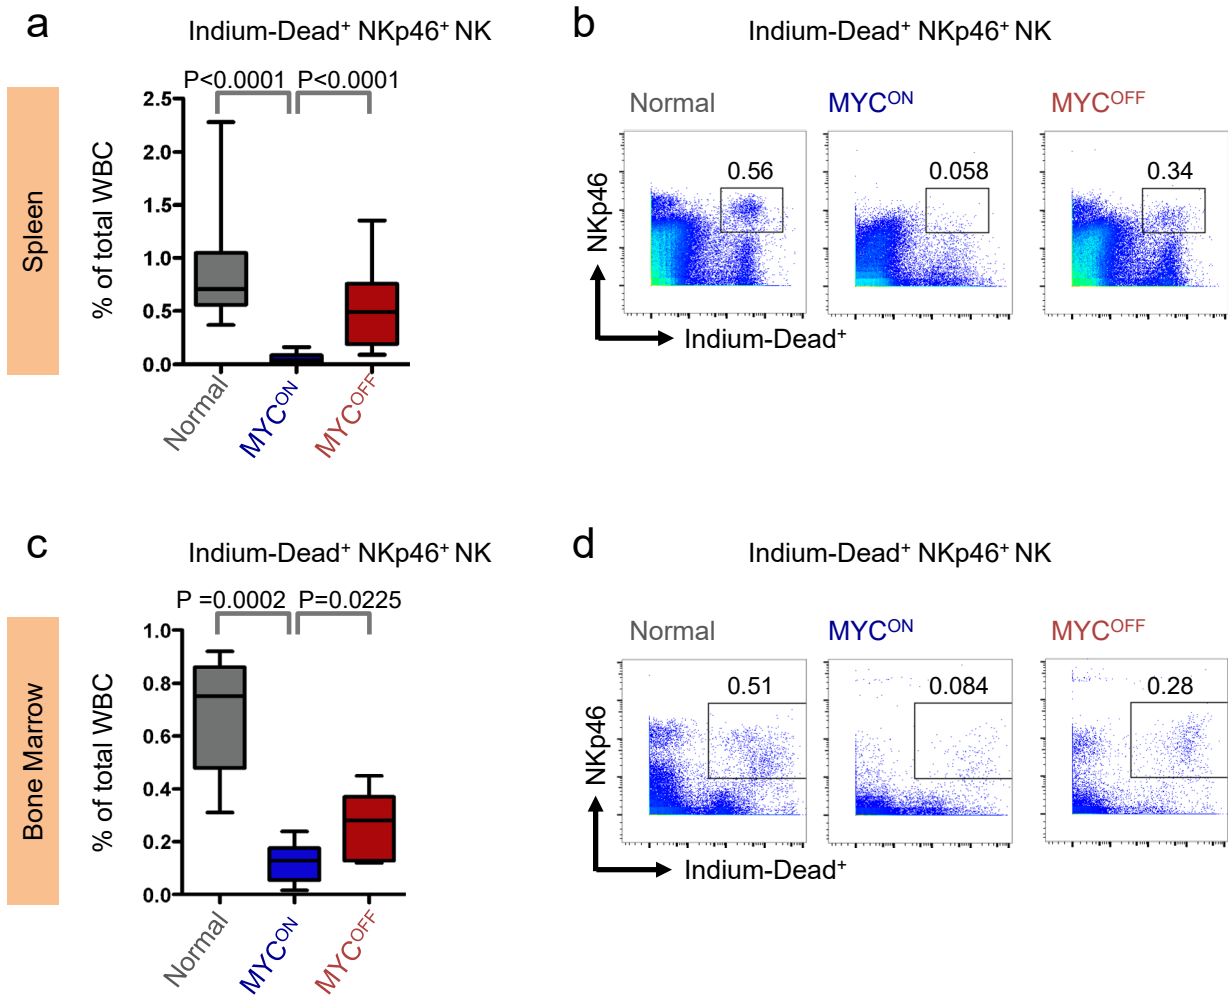

**Supplementary Figure 8: Increased cell death is not responsible for reduction of NK cells in MYC-driven lymphomas.** (a-b) Quantification of percentages (a), and representative plots (b) of dead NK cells (Indium-Dead<sup>+</sup> NKp46<sup>+</sup>) in normal (n = 11), *SRα-tTA MYC<sup>ON</sup>* (n = 9), and *SRα-tTA MYC<sup>OFF</sup>* (doxycycline 96 h, n = 10) spleens measured by CyTOF. (c-d) Quantification of percentages (c), and representative plots (d) of dead NK cells (Indium-Dead<sup>+</sup> NKp46<sup>+</sup>) in normal (n = 7), *SRα-tTA MYC<sup>ON</sup>* (n = 9), and *SRα-tTA MYC<sup>OFF</sup>* (doxycycline 96 h, n = 7) bone marrows measured by CyTOF. Two-sided p values were calculated using the Mann-Whitney test (ns = not significant). For all box plots, center is at the median, minima and maxima are indicated by whiskers, and the box represents data between the 25<sup>th</sup> and 75<sup>th</sup> percentile.

**Supplementary Figure 9:** *Strain-specific expression pattern of CD27 and CD11b on mature NK cells*

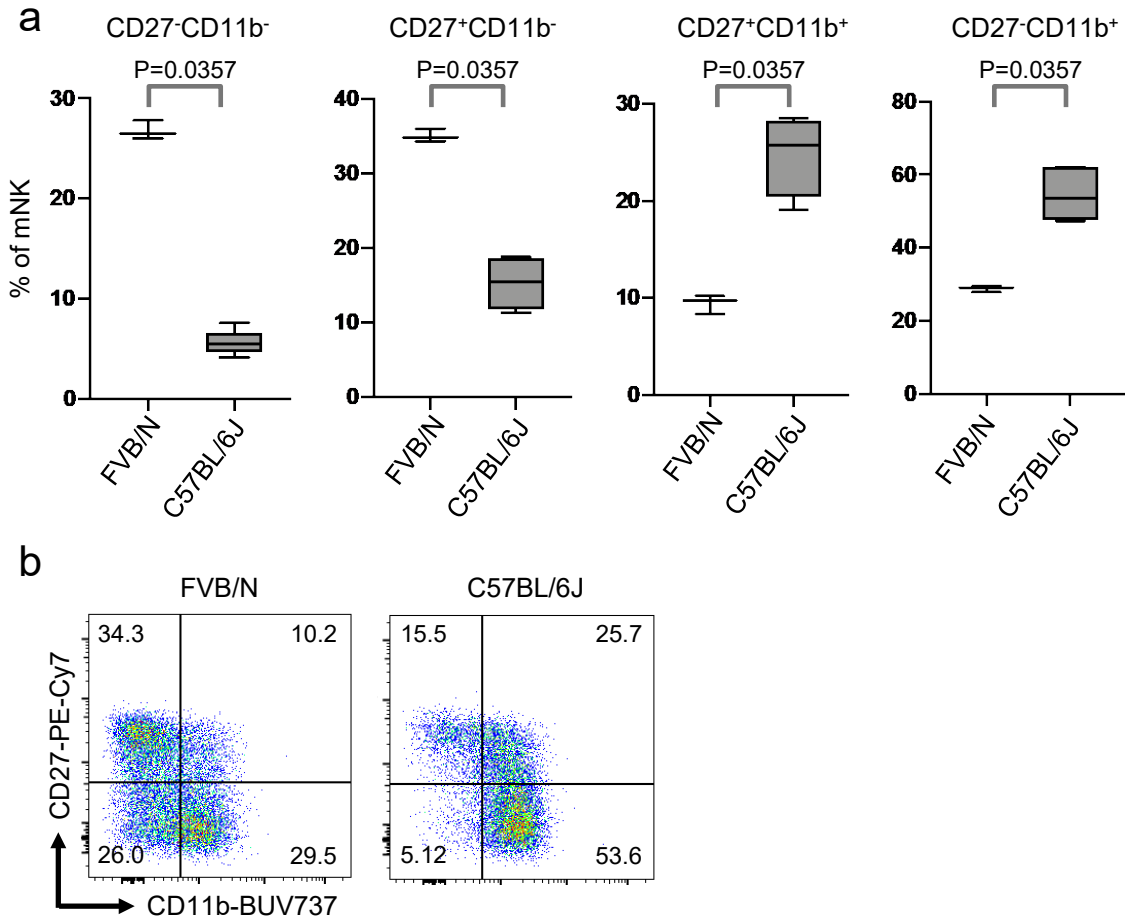

**Supplementary Figure 9. Strain-specific expression pattern of CD27 and CD11b on mature NK cells.** (a-b) Quantification of percentages (a) and representative flow plots (b) of mNK cells expressing CD27 and CD11b in spleen in FVB/N wt (n = 3) and C57BL/6J wt (n = 5) mice. Populations were gated on Lin-CD122<sup>+</sup>NKp46<sup>+</sup>CD49b<sup>+</sup> mature NK (mNK) intact live singlets. Two-sided p values were calculated using the Mann-Whitney test. For all box plots, center is at the median, minima and maxima are indicated by whiskers, and the box represents data between the 25<sup>th</sup> and 75<sup>th</sup> percentile.

**Supplementary Figure 10: Doxycycline does not impact NK cell maturation in FVB/N wt**

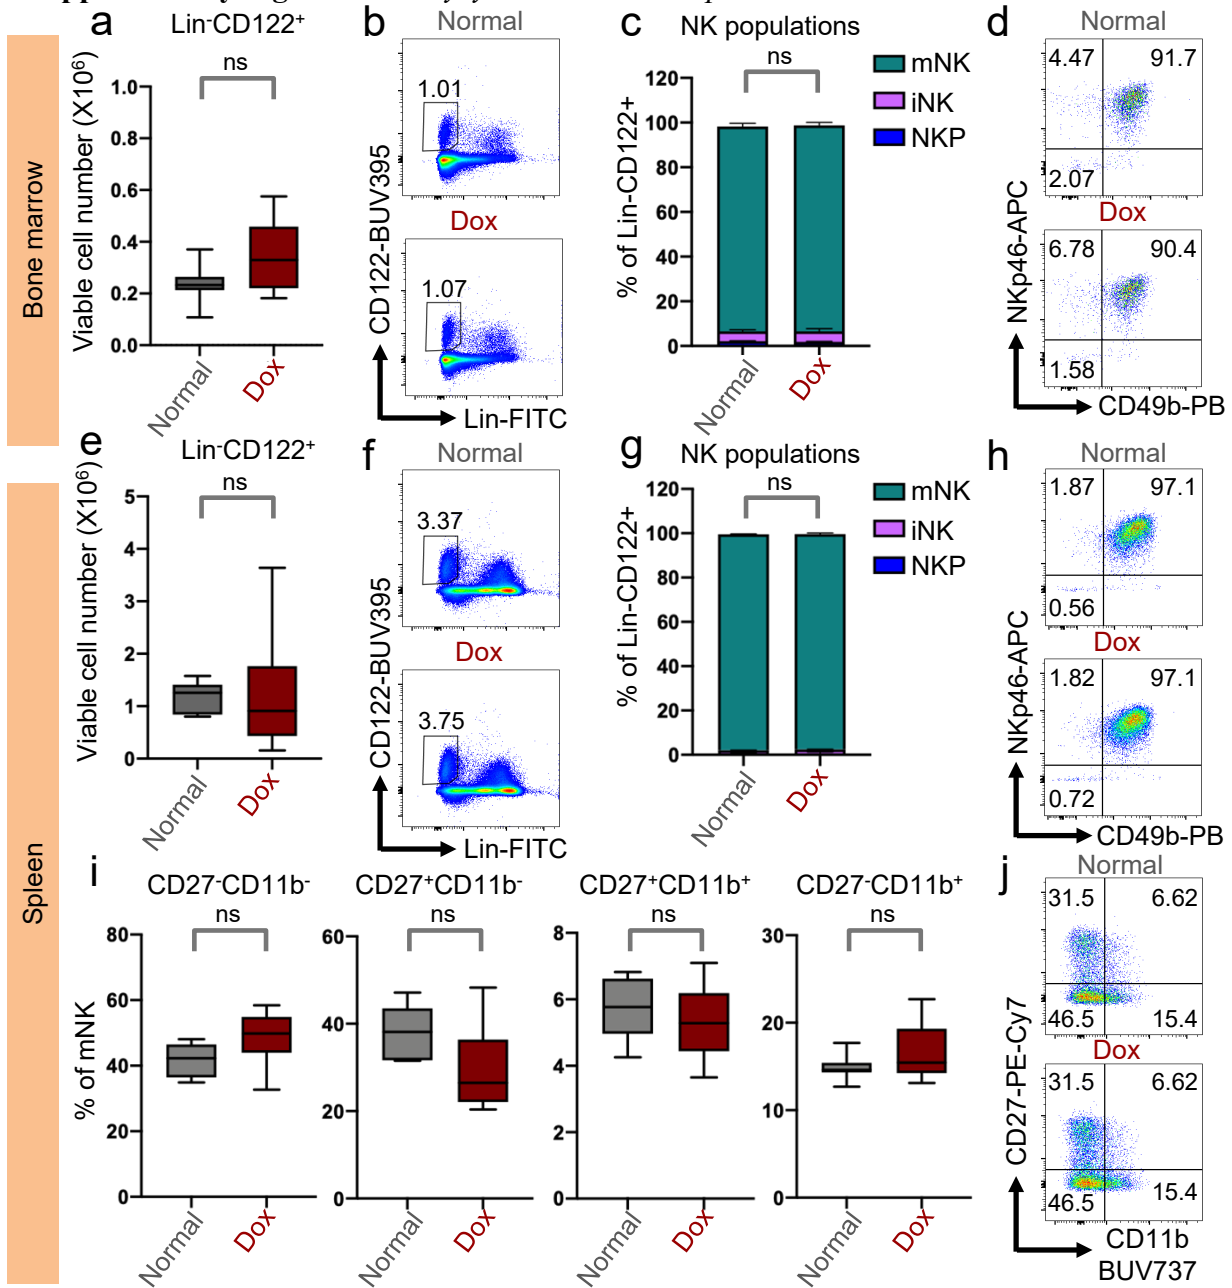

**Supplementary Figure 10. Doxycycline does not impact NK cell maturation in FVB/N wt.** FVB/N wt mice were left untreated (Normal) or treated with doxycycline for 96 hrs (Dox). **(a-b)** Quantification of absolute cell number of Lin<sup>-</sup>CD122<sup>+</sup> cells **(a)** and representative flow plots **(b)** in bone marrow measured by flow cytometry of Normal (n = 7) and Dox treated mice (n = 6). **(c-d)** Quantification of percentages **(c)** and representative flow plots **(d)** of NKP, iNK and mNK from bone marrow in Normal (n = 7) and Dox treated mice (n = 6). Data in **(c)** show mean+SD. **(e-f)** Quantification of absolute cell number of Lin<sup>-</sup>CD122<sup>+</sup> cells **(e)** and representative flow plots **(f)** in spleen measured by flow cytometry of Normal (n = 7) and Dox treated mice (n = 6). **(g-h)** Quantification of percentages **(g)** and representative flow plots **(h)** of NKP, iNK and from spleen of Normal (n = 7) and Dox treated mice (n = 6). Data in **(g)** show mean+SD **(i-j)** Quantification of percentages **(i)** and representative flow plots **(j)** of mNK cells expressing CD27 and CD11b in spleen measured by flow cytometry of Normal (n = 7) and Dox treated mice (n = 6). Two-sided p values were calculated using the Mann-Whitney test (ns = not significant). For all box plots, center is at the median, minima and maxima are indicated by whiskers, and the box represents data between the 25<sup>th</sup> and 75<sup>th</sup> percentile. Lin = Lineage.

Supplementary Figure 11: Peripheral involvement of MYC-driven lymphomagenesis

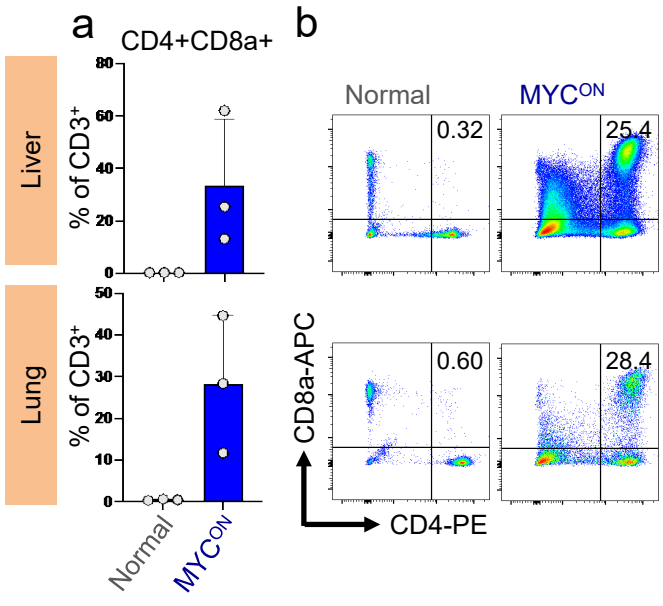

**Supplementary Figure 11. Peripheral involvement of MYC-driven lymphomagenesis. (a-b)** Quantifications of percentages (a) and representative flow plots (b) of CD4<sup>+</sup>CD8<sup>+</sup> double positive lymphoblasts gated on CD3<sup>+</sup> live intact singlets from liver and lung in normal (n = 3) and *SRA-tTA MYC<sup>ON</sup>* (n = 3). The bars in (a) indicate mean+SD.

**Supplementary Figure 12: MYC driven lymphomagenesis prevents NK maturation in liver and lung.**

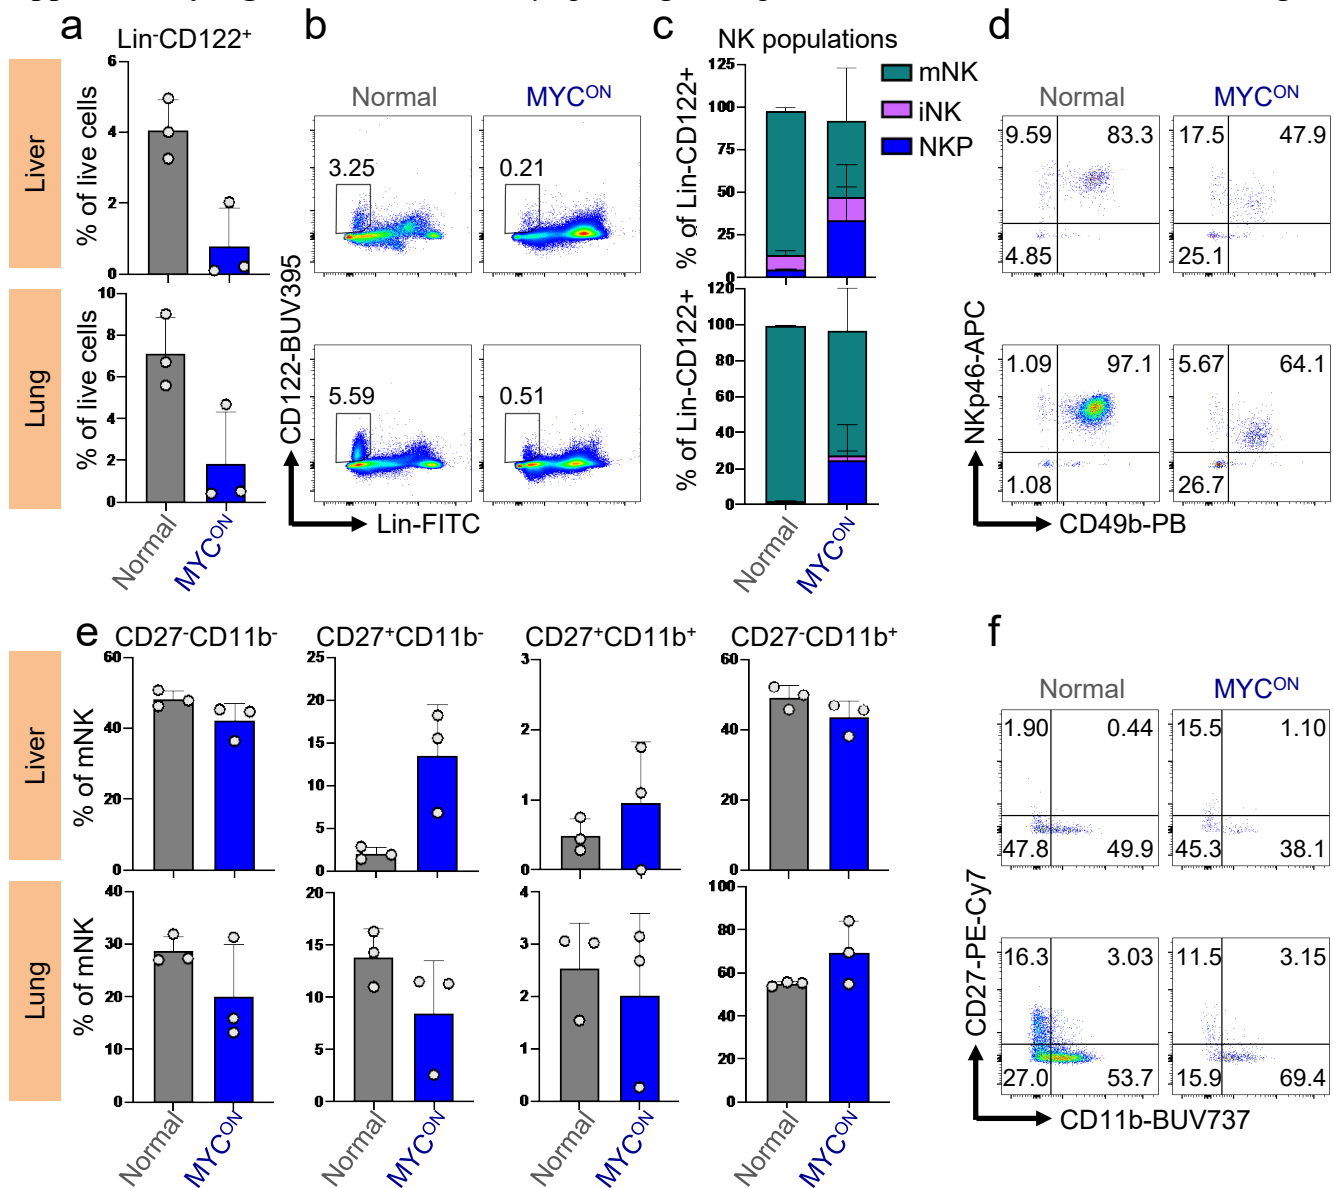

**Supplementary Figure 12. MYC driven lymphomagenesis prevents NK maturation in liver and lung.** (a-b) Quantification of percentages of Lin<sup>-</sup>CD122<sup>+</sup> cells (a) and representative flow plots (b) in liver and lung in normal (n = 3) and *SRA-tTA MYC<sup>ON</sup>* (n = 3) mice measured by flow cytometry. The bars in (a) indicate mean+SD. (c-d) Quantification of percentages (c) and representative flow plots (d) of NKP, iNK and mNK gated on the Lin<sup>-</sup>CD122<sup>+</sup> live intact singlets from liver and lung in normal (n = 3) and *SRA-tTA MYC<sup>ON</sup>* (n = 3). Data in (c) show mean+SD. (e-f) Quantification of percentages (e) and representative flow plots (f) of mNK cells expressing CD27 and CD11b in liver and lung in normal (n = 3) and *SRA-tTA MYC<sup>ON</sup>* (n = 3) mice. Populations are gated on Lin<sup>-</sup>CD122<sup>+</sup>NKp46<sup>+</sup>CD49b<sup>+</sup> intact live singlets. The bars in (e) indicate mean+SD.



**Supplementary Figure 13:** *Transcriptional repression of key NK cell genes during primary MYC-driven T cell lymphomagenesis*

NK-mediated immune surveillance

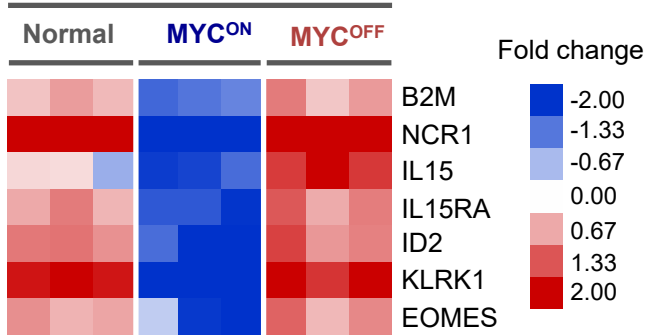

**Supplementary Figure 13. Transcriptional repression of key NK cell genes during primary MYC-driven T cell lymphomagenesis.** Heatmap comparing expression of key NK cell genes in splenic samples from normal (n = 3), *SRα-tTA MYC<sup>ON</sup>* (n = 3), and *SRα-tTA MYC<sup>OFF</sup>* (n = 3) mice.

**Supplementary Figure 14:** *Transcriptional repression of Type I IFN signaling during murine MYC-driven B cell lymphomagenesis*

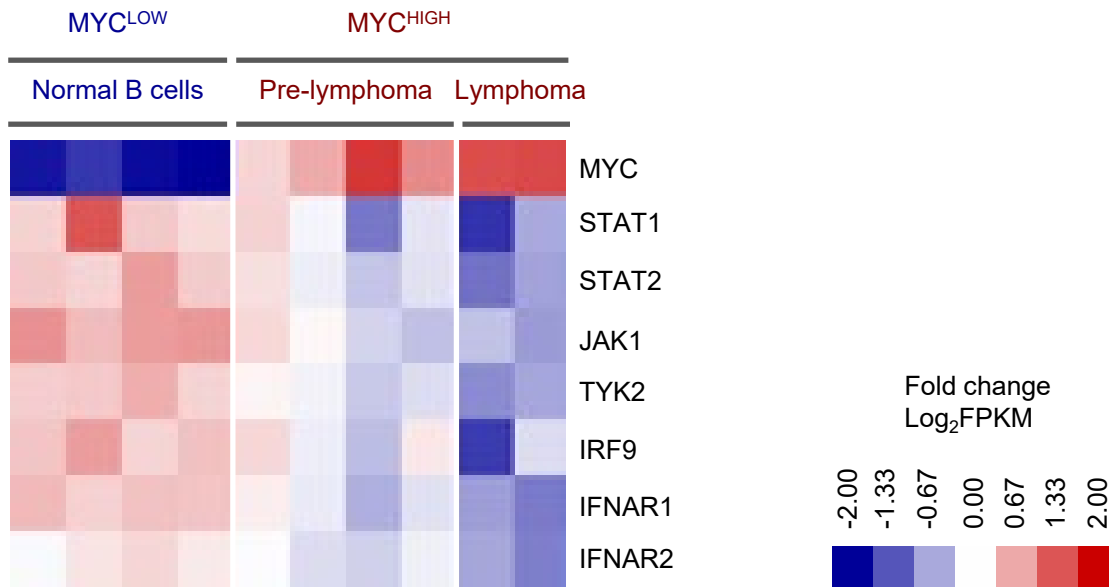

**Supplementary Figure 14: Transcriptional repression of Type I IFN signaling during murine MYC-driven B cell lymphomagenesis.** Heat map comparing transcriptional changes in Type I IFN signaling genes in normal B cells from healthy mice (MYC<sup>LOW</sup>, n = 4), pre-lymphomagenic B cells from *Eμ-MYC* mice (pre-lymphoma, MYC<sup>HIGH</sup>, n = 4), and in full blown primary B cell lymphomas from *Eμ-MYC* mice (MYC<sup>HIGH</sup>, n = 2) using RNA sequencing (GSE51008).

**Supplementary Figure 15:** *Short term IFN $\alpha$  administration does not affect lymphoma T cell count.*

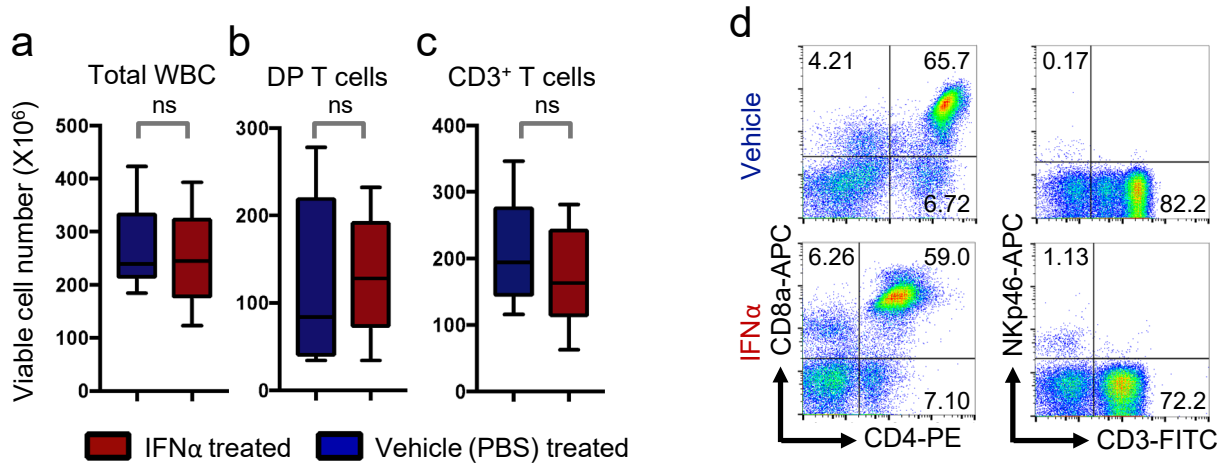

**Supplementary Figure 15: Short term IFN $\alpha$  administration does not affect lymphoma T cell count.** (a-c) Quantification of absolute counts of total WBC (a), CD4<sup>+</sup> CD8<sup>+</sup> DP T (b) and CD3<sup>+</sup> pan T (c) in *SR $\alpha$ -tTA/tet-O-MYC* mice bearing overt lymphomas (*SR $\alpha$ -tTA MYC<sup>ON</sup>*) treated for three days with either IFN $\alpha$  (n = 5), or vehicle (PBS, n = 5). (d) Representative flow cytometry plots comparing percentages of CD4<sup>+</sup> CD8<sup>+</sup> DP T (left) and CD3<sup>+</sup> NKp46<sup>-</sup> NK (right) cells between *SR $\alpha$ -tTA/tet-O-MYC* mice in IFN $\alpha$ -treated and vehicle (PBS)-treated groups for three days. Two sided p-values were calculated using the Mann-Whitney test (ns = not significant). For all box plots, center is at the median, minima and maxima are indicated by whiskers, and the box represents data between the 25<sup>th</sup> and 75<sup>th</sup> percentile.

**Supplementary Figure 16: Blocking *IFNAR1* does not impair splenic NK cell replenishment in *SR $\alpha$ -tTA MYC<sup>OFF</sup>***

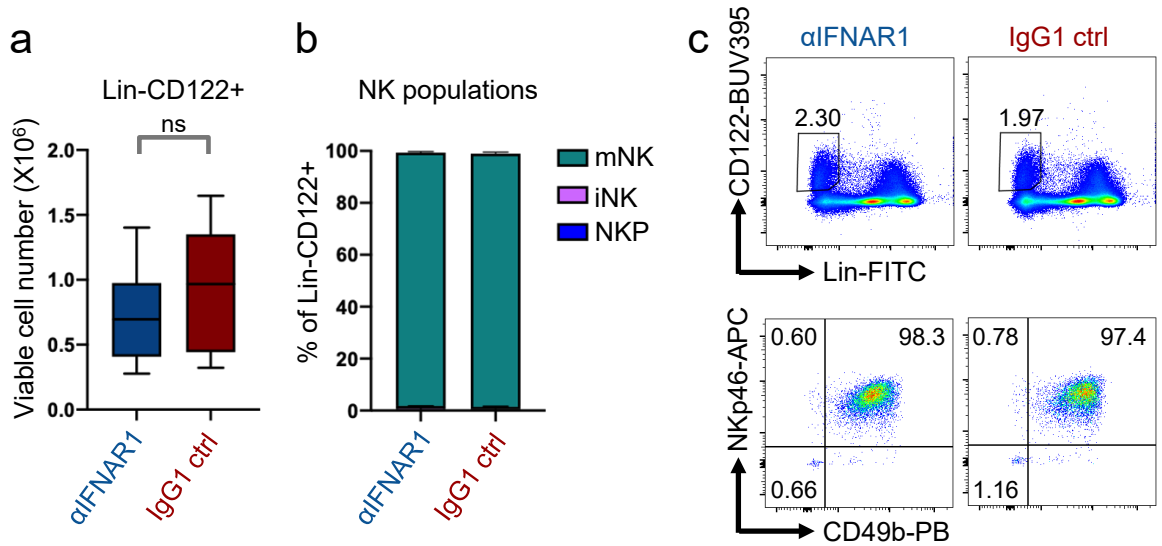

**Supplementary Figure 16: Blocking *IFN $\alpha$ R1* does not impair splenic NK cell replenishment in *SR $\alpha$ -tTA MYC<sup>OFF</sup>* mice.** (a) Quantification of absolute cell number of Lin<sup>-</sup>CD122<sup>+</sup> in spleen of *SR $\alpha$ -tTA MYC<sup>OFF</sup>* (doxycycline 96 h) treated with anti-IFN $\alpha$ R1 (n = 7) or IgG1 control (n = 5) during the four-days doxycycline treatment period. ns = non-significant calculated by Mann-Whitney test. (b) Quantification of percentages of NKP, iNK and mNK gated on the Lin<sup>-</sup>CD122<sup>+</sup> live intact singlets from spleen of *SR $\alpha$ -tTA MYC<sup>OFF</sup>* (doxycycline 96h) treated with anti-IFN $\alpha$ R1 (n = 7) or IgG1 control (n = 5) during the four-days doxycycline treatment period. Data show mean+SD. (c) Representative flow plots for expression of Lineage markers, CD122, NKp46 and CD49b. Two-sided p values were calculated using the Mann-Whitney test (ns = not significant). For all box plots, center is at the median, minima and maxima are indicated by whiskers, and the box represents data between the 25<sup>th</sup> and 75<sup>th</sup> percentile.

**Supplementary Figure 17:** *Signaling and surface receptor changes after MYC inactivation in human BL model*

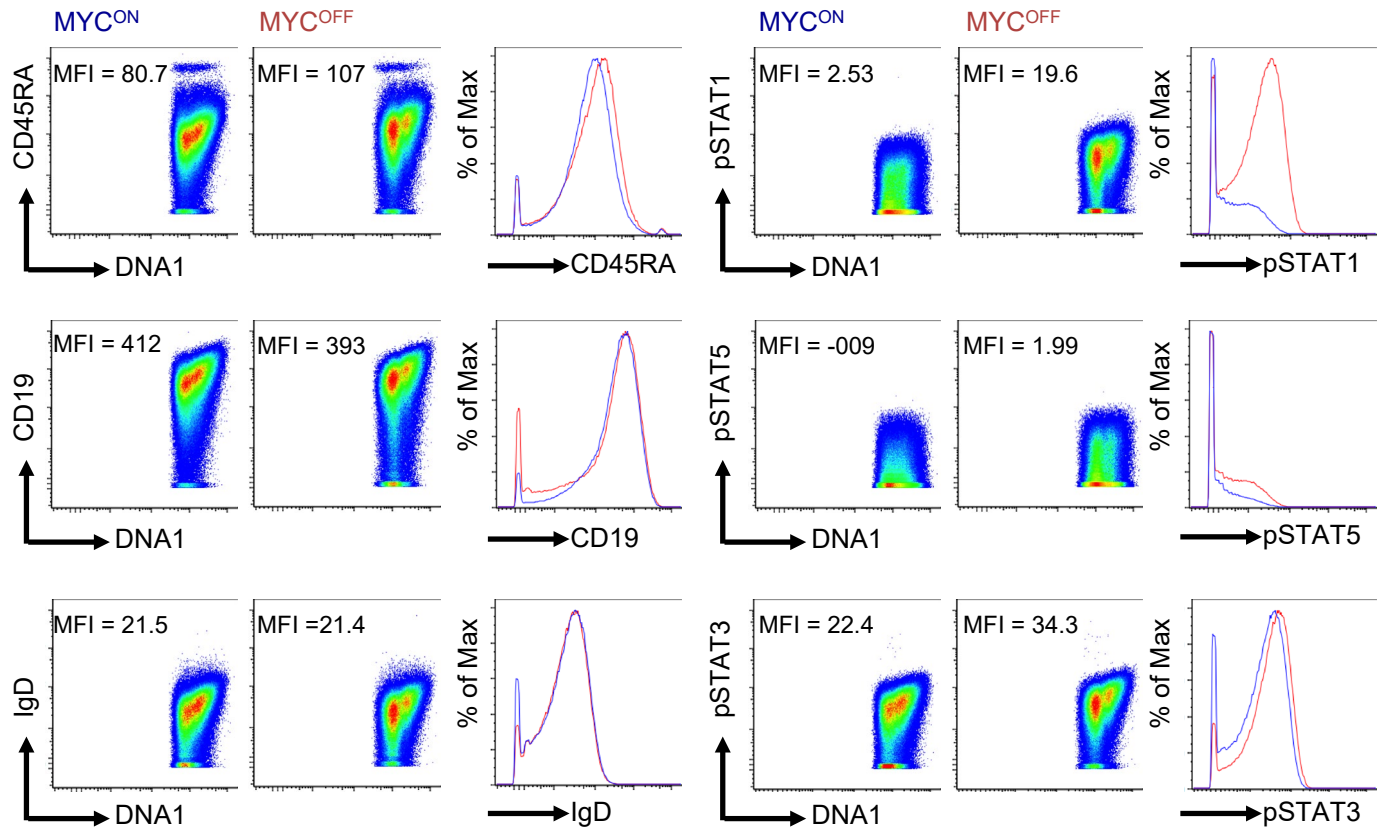

**Supplementary Figure 17: Signaling and surface receptor changes after MYC inactivation in human BL model.** Dot plots of Phospho-CyTOF depicting the global changes in B cell specific surface receptors and cytokine JAK-STAT signaling pathways after turning MYC off for 24h in P493-6 cells.



Supplementary Figure 18: Full scan of blot shown in Figure 5c

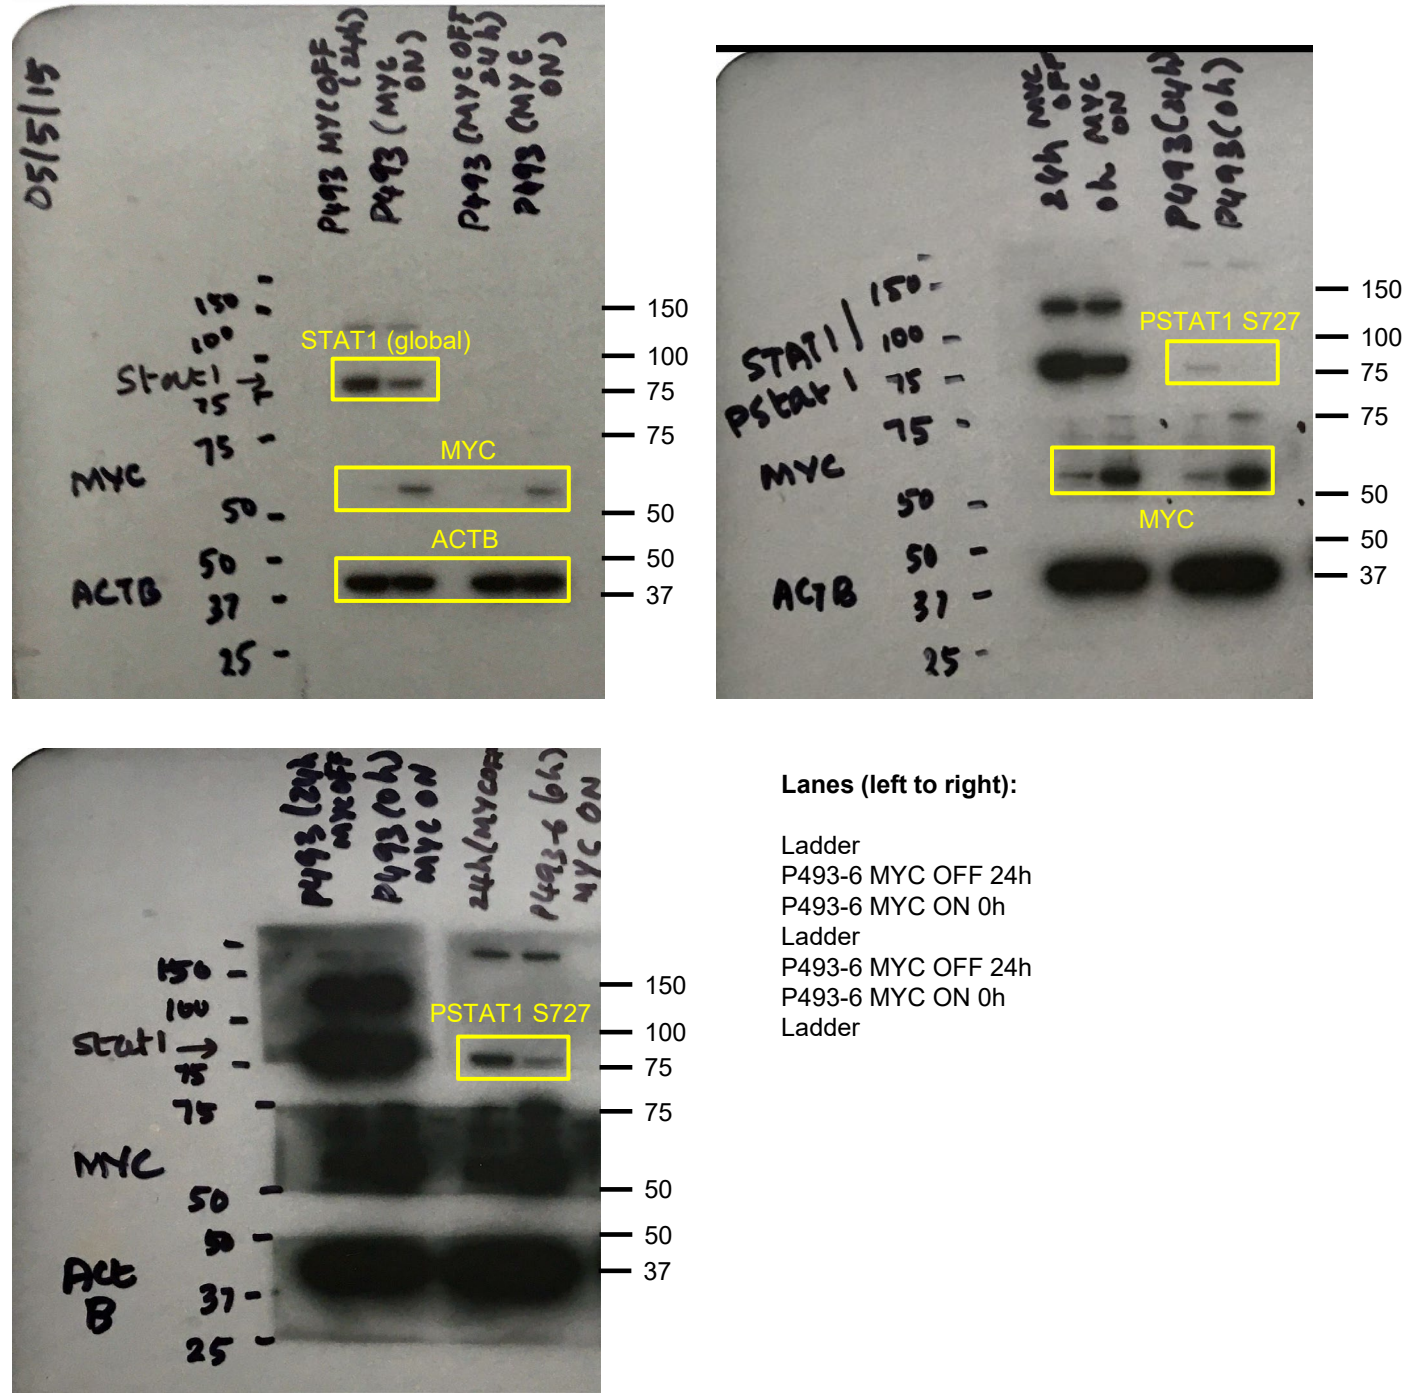

Supplementary Figure 18: Full scan of blot shown in Figure 5c. Blot was developed on a film.

**Supplementary Figure 19:** *High MYC levels in B cell lymphomas block transcription of STAT1 and STAT2*

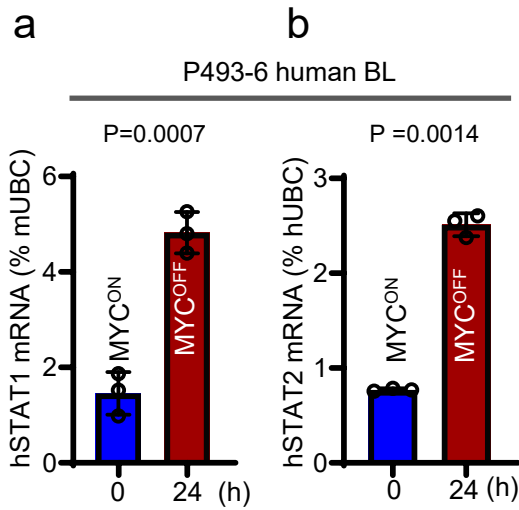

**Supplementary Figure 19: High MYC levels in B cell lymphomas block transcription of STAT1 and STAT2.** (a-b) Quantitative real time PCR for hSTAT1 (a) and, hSTAT2 (b) in P493-6 human BL cell line before and after MYC inactivation by doxycycline for 24 hours (n = 3, mean  $\pm$  s.d). Two-sided p-values have been calculated using the Student's t-test.

**Supplementary Figure 20:** *MYC* inactivation in BL changes the secreted cytokine profile

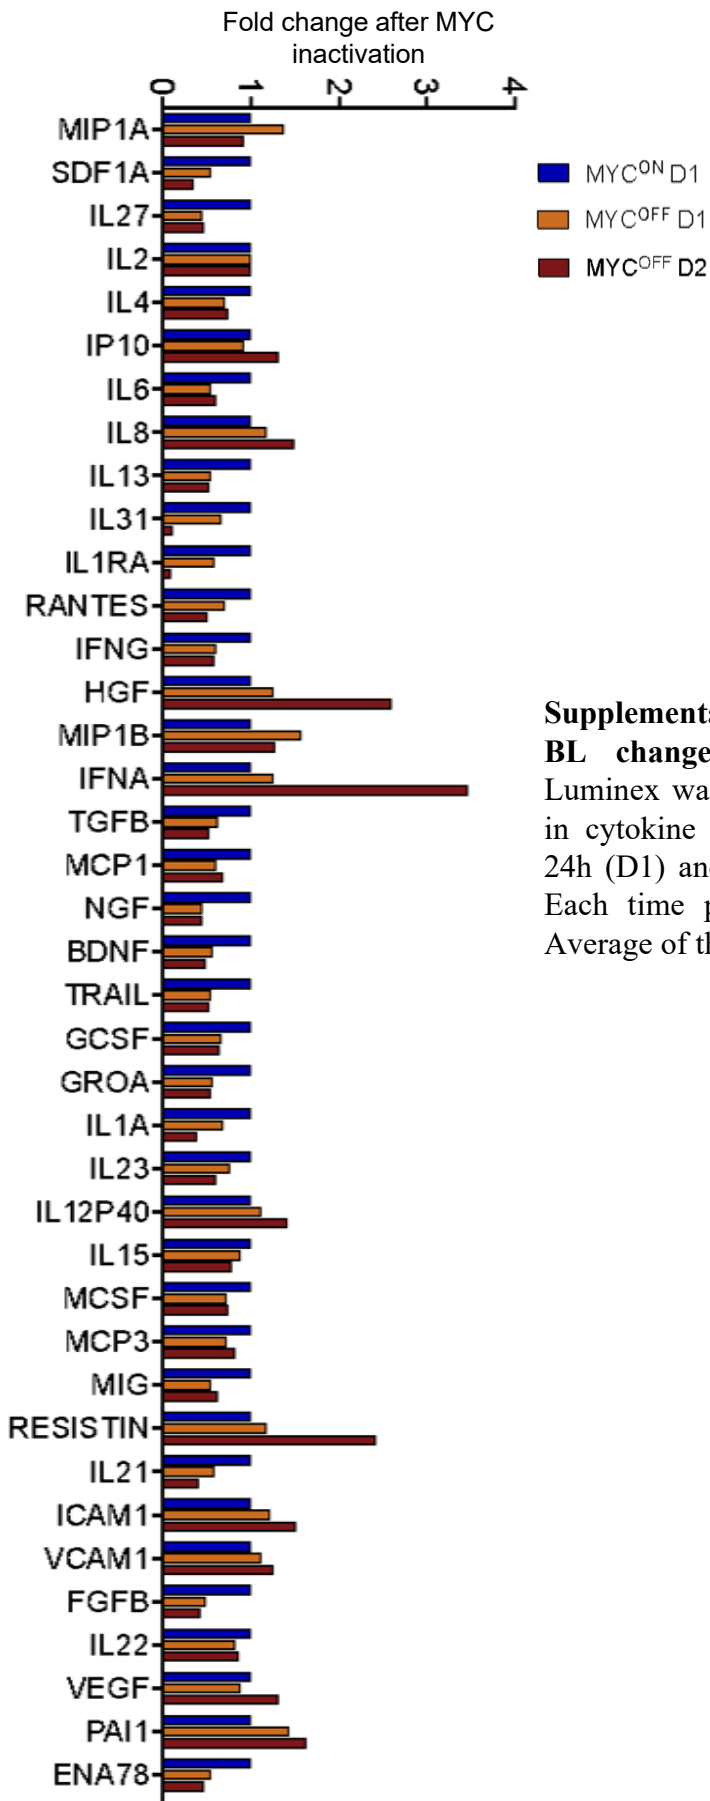

**Supplementary Figure 20: MYC inactivation in BL changes the secreted cytokine profile.** Luminex was used to evaluate the global changes in cytokine secretion post MYC inactivation for 24h (D1) and 48h (D2) in the P493-6 BL model. Each time point was carried out in duplicates. Average of these duplicates is shown.

**Supplementary Figure 21:** *Flow cytometry validation of T-lymphoma cell line derived from an SR $\alpha$ -tTA/Tet-O-MYC mouse*

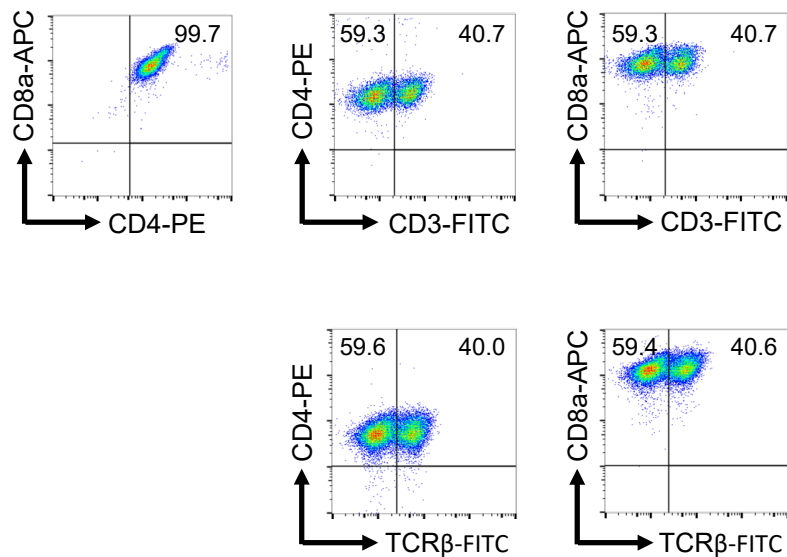

**Supplementary Figure 21: Flow cytometry validation of a T-lymphoma cell line derived from an SR $\alpha$ -tTA/Tet-O-MYC mouse.** Flow cytometry plots depicting the surface expression of T cell markers, such as CD3, CD4, CD8 and TCR $\beta$  in a cell line derived from SR $\alpha$ -tTA /Tet-O-MYC mice.

**Supplementary Figure 22: Suppression of STAT1/2-Type I IFN signaling in MYC-driven T cell lymphomas**

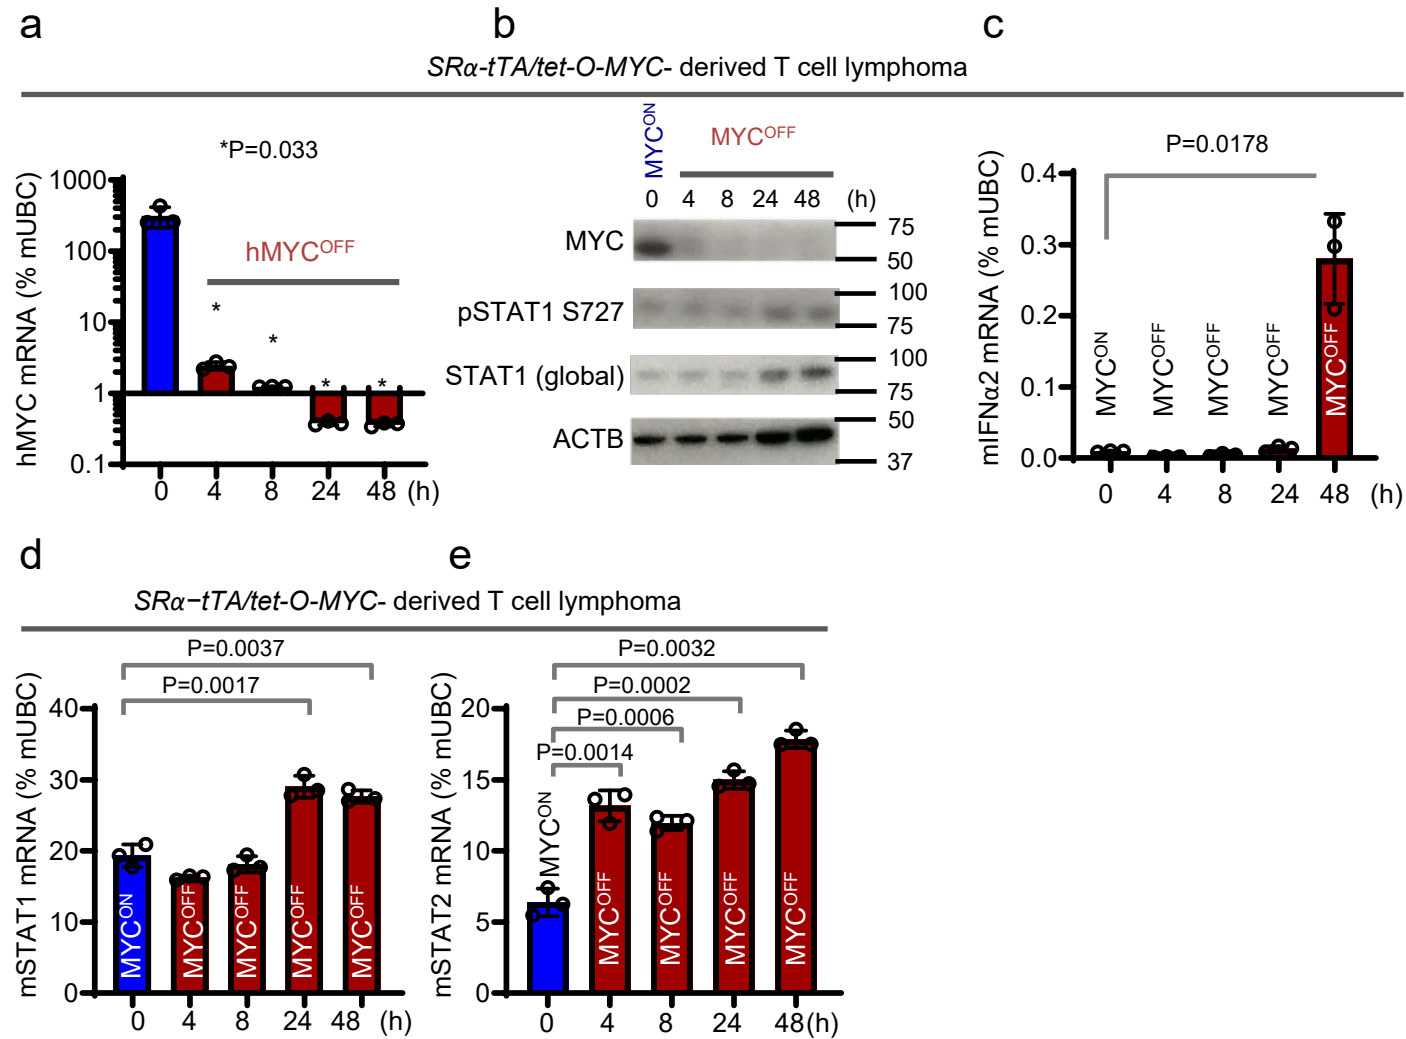

**Supplementary Figure 22: Suppression of STAT1/2-Type I IFN signaling in MYC-driven T cell lymphomas.** (a) Quantitative real time PCR for human MYC transgene in *SRα-tTA MYC* transgenic mouse T-lymphoma cells before and after MYC inhibition by doxycycline for 4, 8, 24 and 48h (n = 3, mean ± s.d). (b) Immunoblotting to measure changes in STAT1 activation pre- and post-MYC transgene inactivation in *SRα-tTA MYC* mouse T-lymphoma cells. (c-e) Quantitative real time PCR for mType I IFNα2 (c), mSTAT1 (d) and, mSTAT2 (e) in a T-lymphoma cell line derived from an *SRα-tTA/tet-O-MYC* mouse before and after MYC inactivation by doxycycline for 4, 8, 24 and 48 hours (n = 3, mean ± s.d). Two-sided p values have been calculated using the Student's t-test.



Supplementary Figure 23: Full scan of blot shown in Supplementary Figure 22b

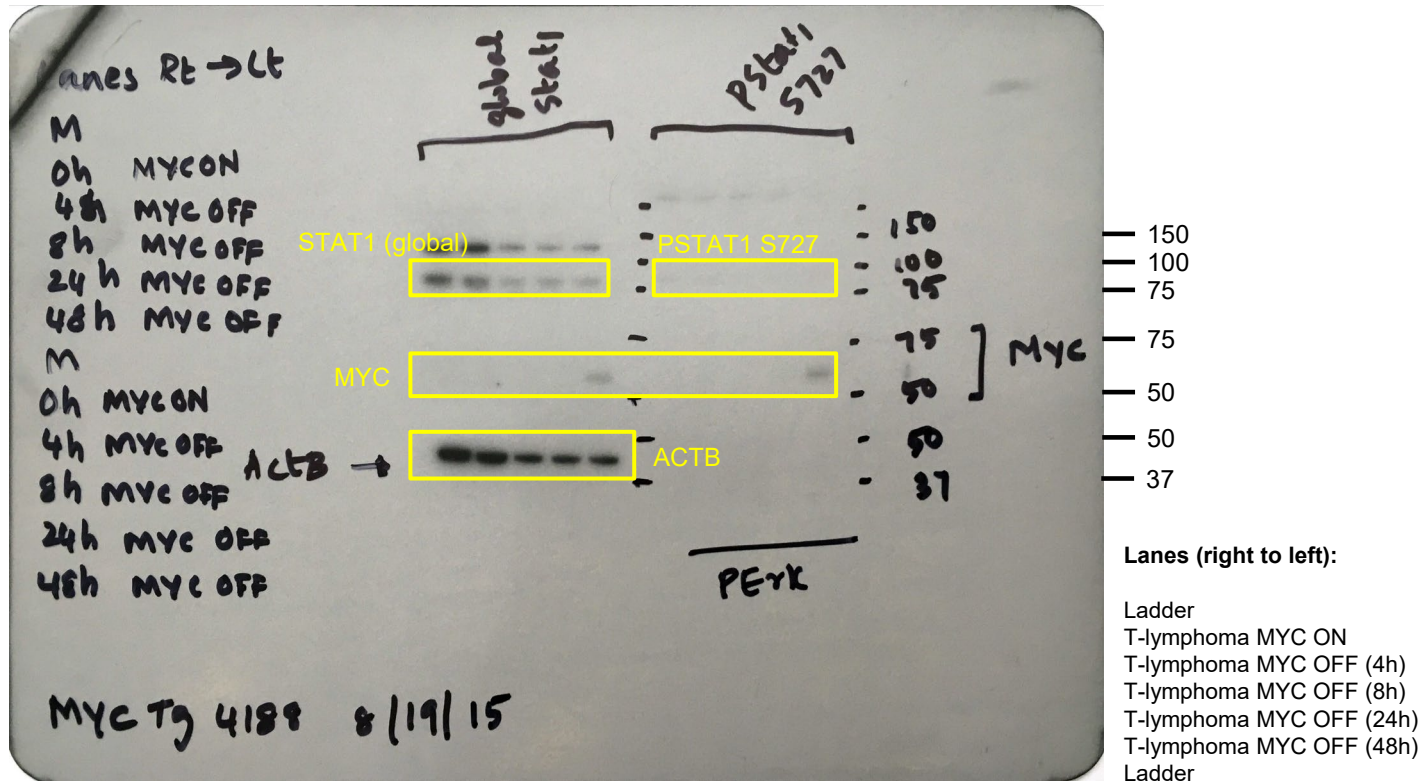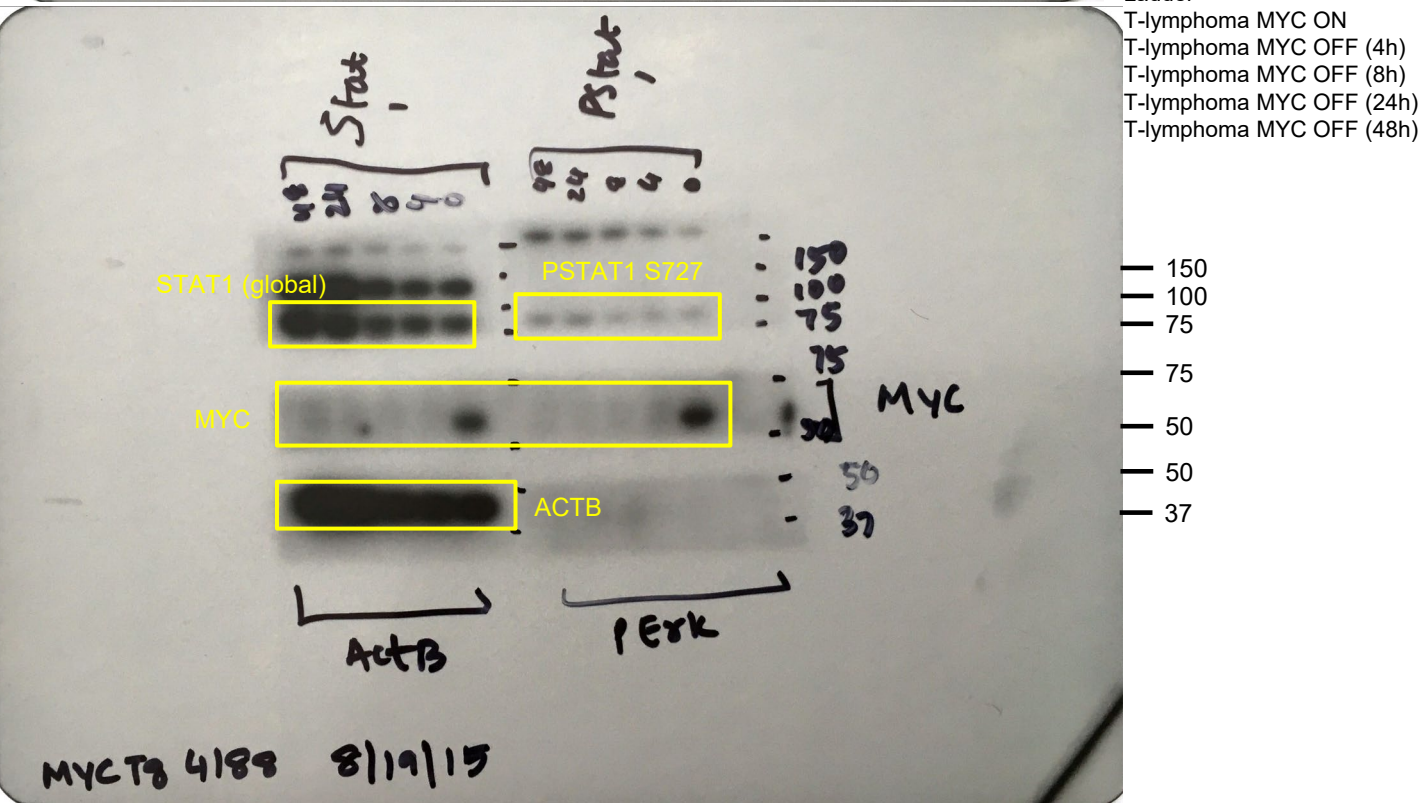

Supplementary Figure 23: Full scan of blot shown in Supplementary Figure 22b. Blot was developed on a film.

**Supplementary Figure 24:** *MYC binds to STAT1 promoter in MYC-driven lymphomas*

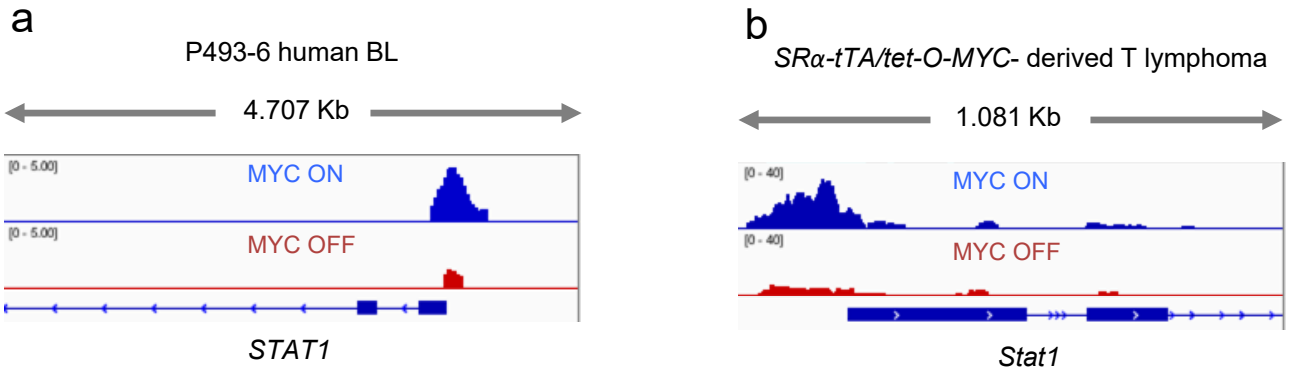

**Supplementary Figure 24: MYC binds to STAT1 promoter in MYC-driven lymphomas. (a-b)** ChIP sequencing depicting binding of MYC to STAT1 promoter in P493-6 (a) and *SRα-tTA MYC* T-lymphoma (b) cell lines before and after MYC inactivation.

Supplementary Figure 25: Full scan of blot shown in Figure 5g

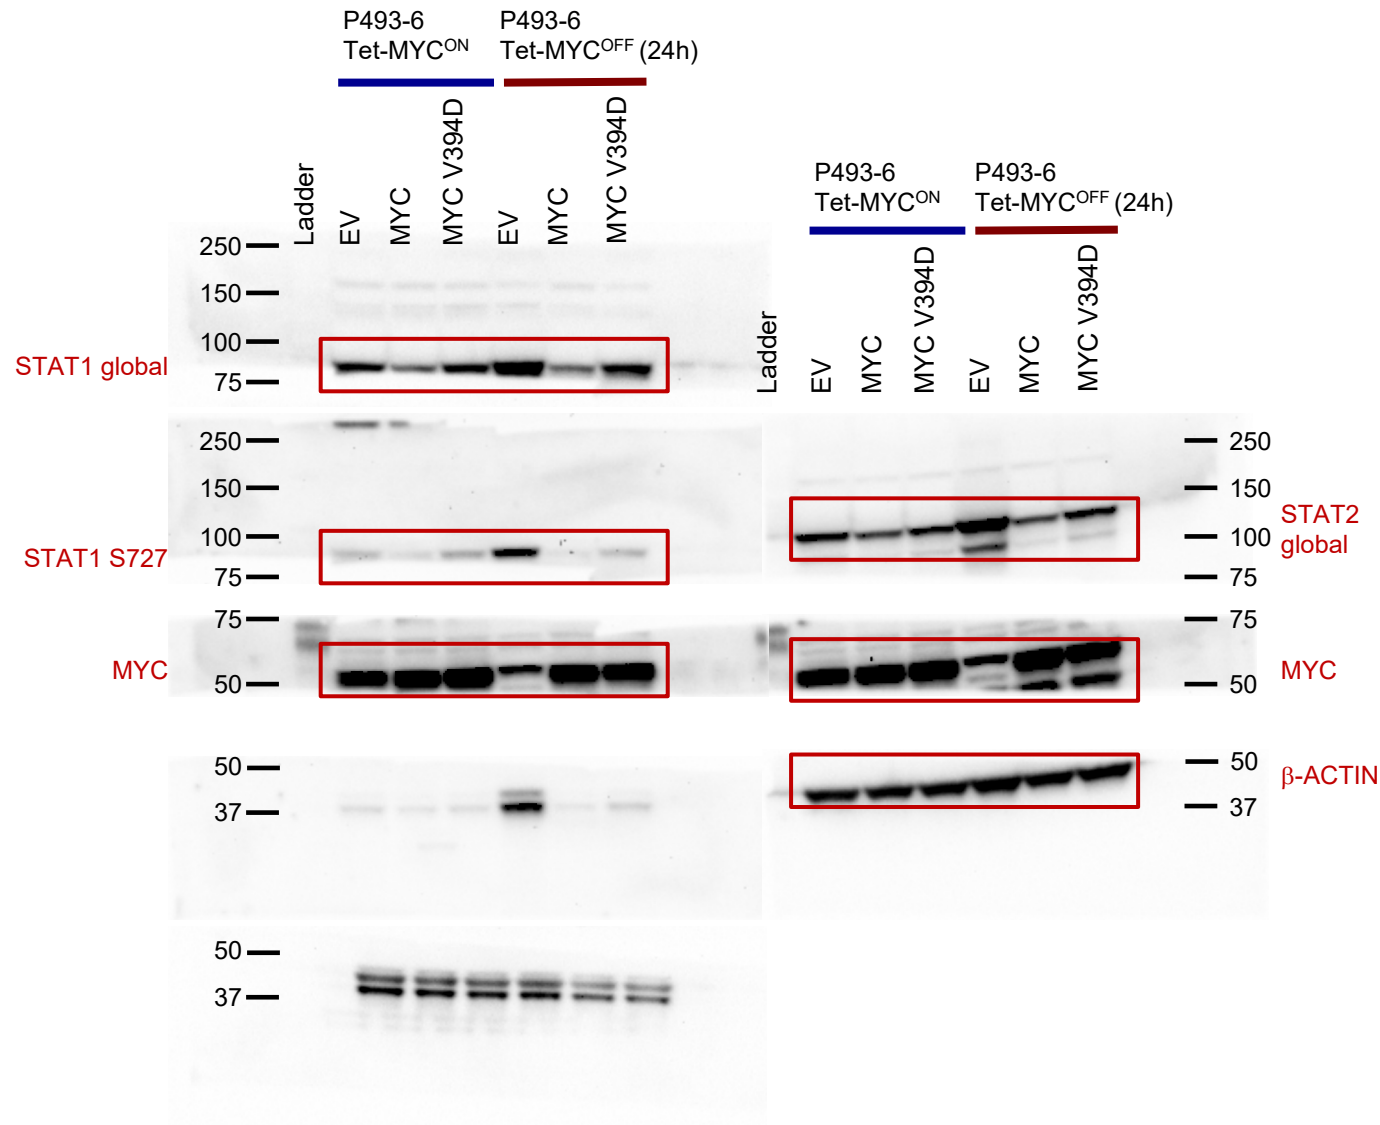

Supplementary Figure 25: Full scan of blot shown in Figure 5g. Blot was developed in Bio-Rad Chemidoc MP Imaging System.

**Supplementary Figure 26: Oncogenic MYC transcriptionally represses STAT1/2-Type I IFN signaling**

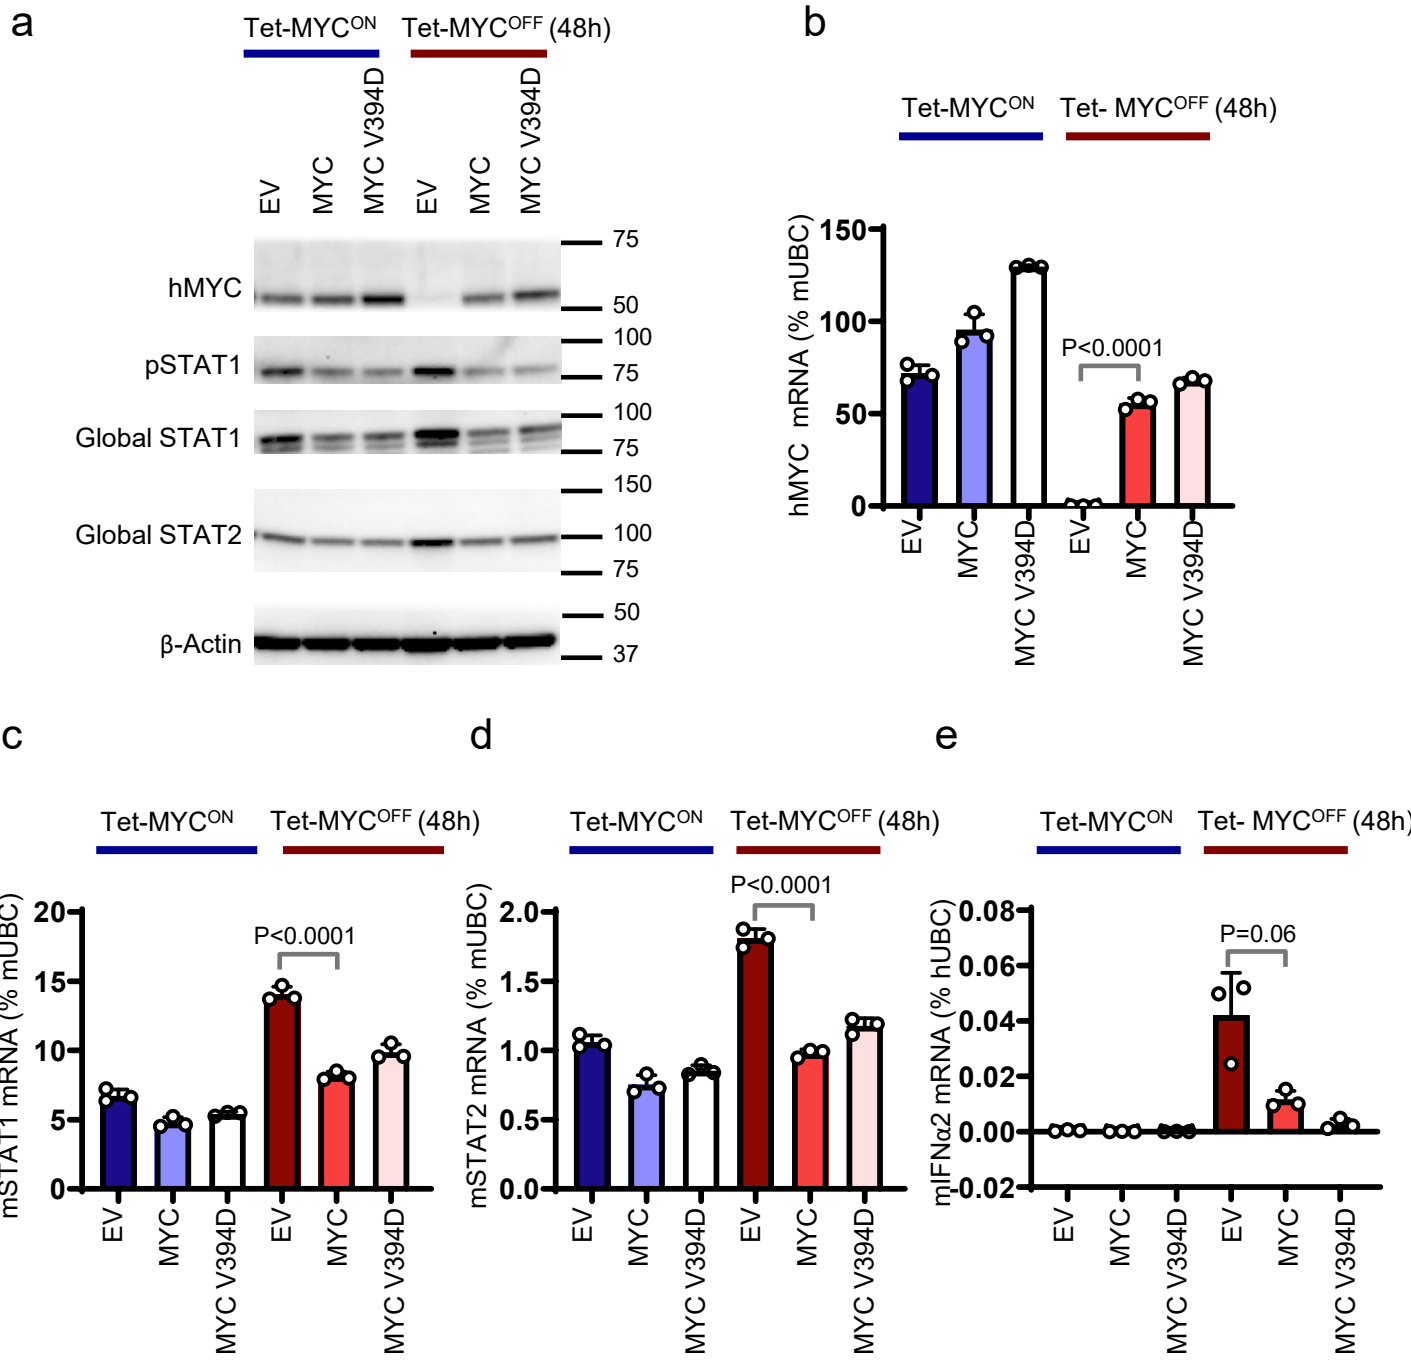

**Supplementary Figure 26: Oncogenic MYC transcriptionally represses STAT1/2-Type I IFN signaling.** (a) Immunoblotting in MYC-driven *SRα-tTA* T-lymphoma cell lines expressing empty vector (EV), MYC overexpression vector (MYC), or a MYC mutant that fails to bind MIZ1 (MYC V394D) before (*Tg-MYC<sup>ON</sup>*) and after (*Tg-MYC<sup>OFF</sup>*) MYC inactivation. (b-e) Quantitative real time PCR for hMYC (b), mSTAT1 (c), mSTAT2 (d), and mIFNα2 (e) in MYC-driven *SRα-tTA* T-lymphoma cell lines expressing empty vector (EV), MYC overexpression vector (MYC), or a MYC mutant that fails to bind MIZ1 (MYC V394D) before (*Tg-MYC<sup>ON</sup>*) and after (*Tg-MYC<sup>OFF</sup>*) MYC inactivation (n = 3, mean ± s.d). Two-sided p values have been calculated using the Student's t-test.

**Supplementary Figure 27:** *Full scan of blot shown in Supplementary Figure 26a*

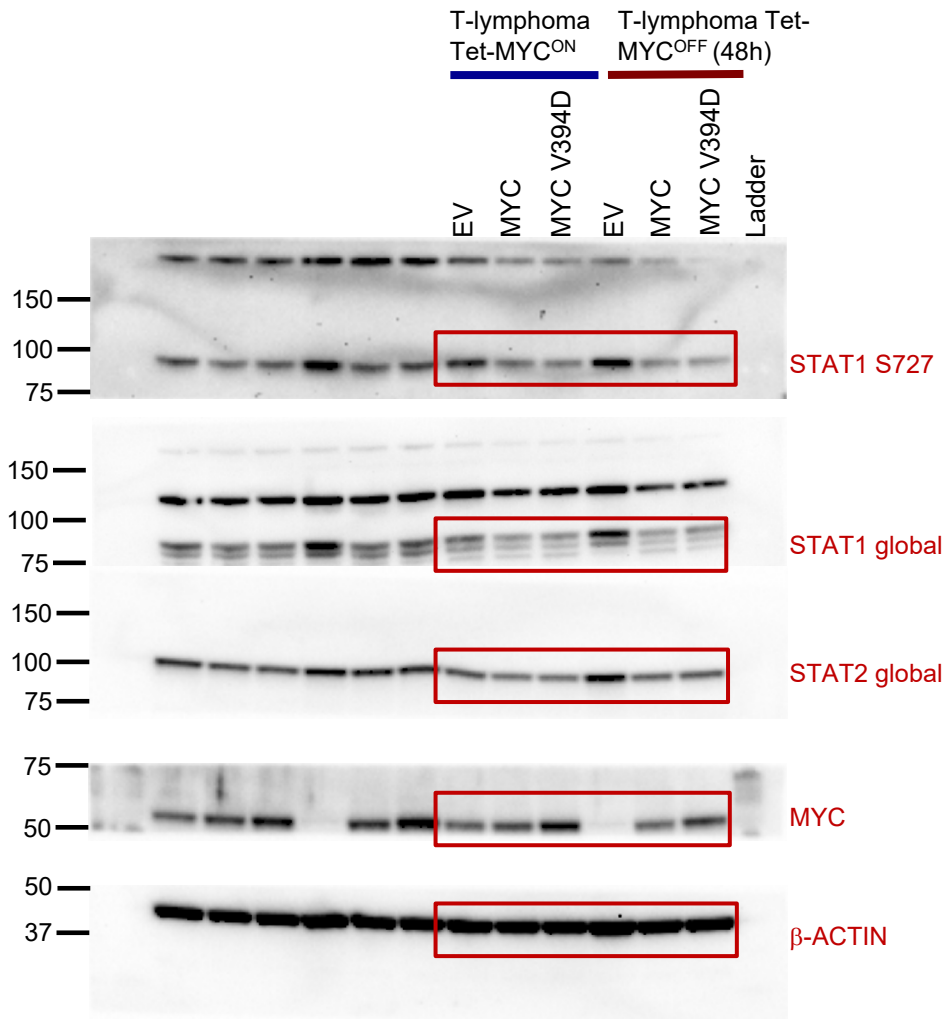

**Supplementary Figure 27:** *Full scan of blot shown in Supplementary Figure 26a.* Blot was developed in Bio-Rad Chemidoc MP Imaging System.



**Supplementary Figure 28:** *Depletion of NK cells increases aggressiveness of MYC-driven T-lymphomas*

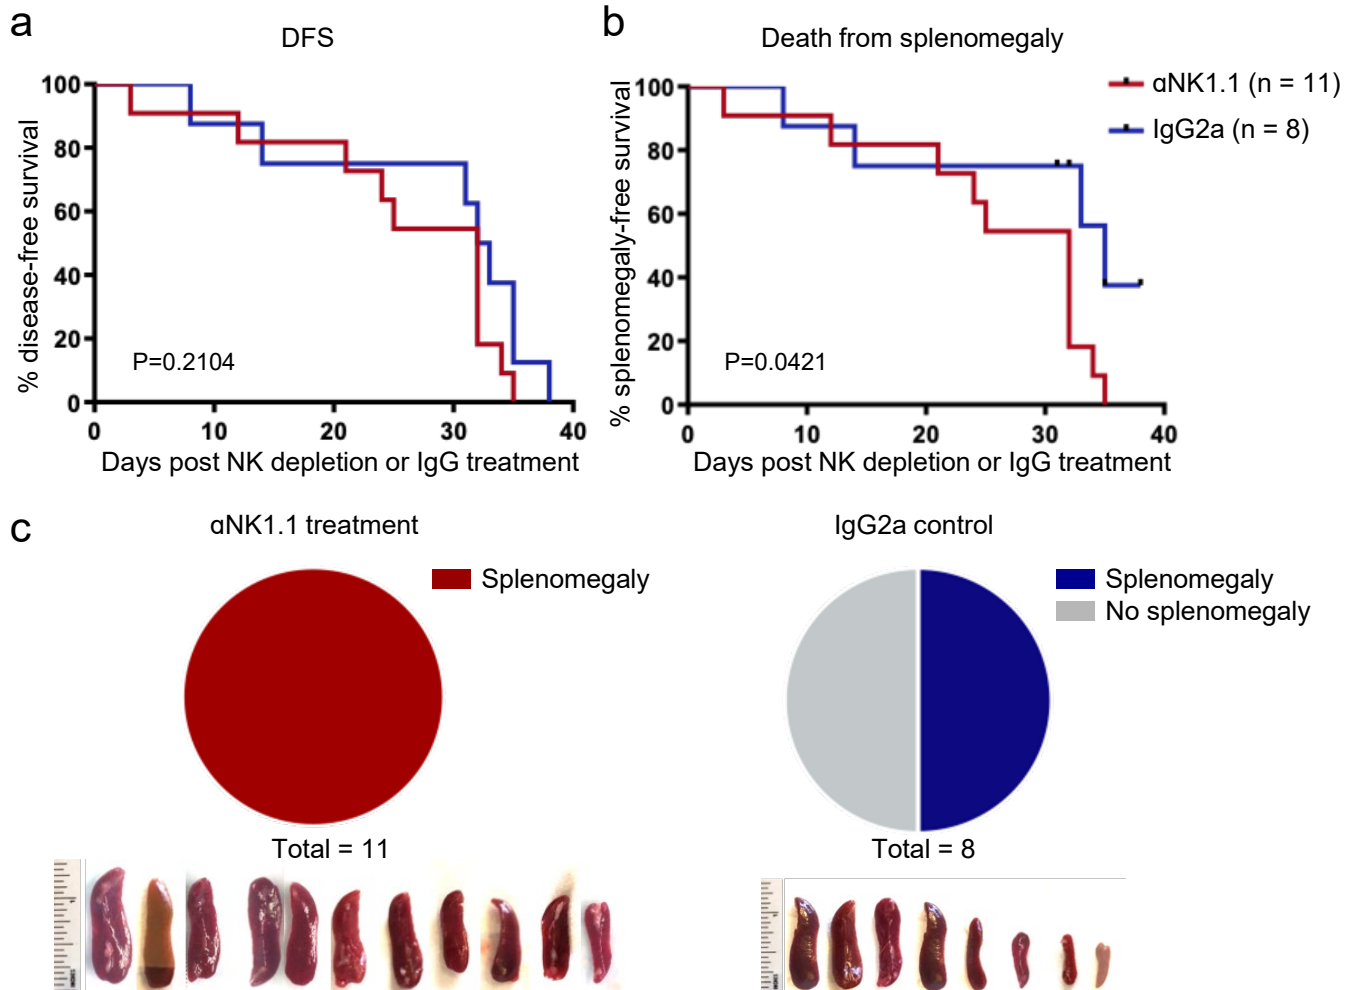

**Supplementary Figure 28: Depletion of NK cells increases aggressiveness of MYC-driven T-lymphomas.** Comparison of survival probabilities of lymphomagenic *SR $\alpha$ -tTA/tet-O-MYC* mice that were treated with either control IgG2a (n = 8) or NK1.1 antibody (n = 11) to deplete NK cells before overt lymphoma manifestation. **(a)** Disease-free survival (DFS). **(b)** Death from splenomegaly. P-value has been calculated using the log-rank test. **(c)** Pie charts and pictures indicating splenomegaly of the *SR $\alpha$ -tTA/tet-O-MYC* mice that were treated with either control IgG2a or NK1.1 depleting antibody. P-values were calculated by log-rank test.

**Supplementary Figure 29:** *Isolation and purification of syngeneic NK cells for adoptive transfer into MYC-driven T-lymphoma bearing NSG recipients*

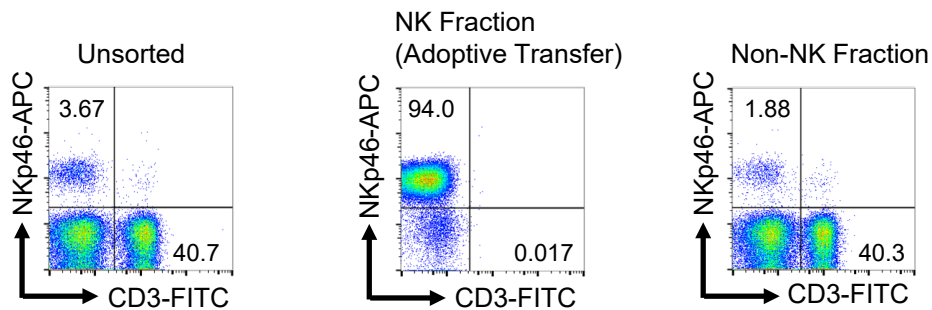

**Supplementary Figure 29: Isolation and purification of syngeneic NK cells for adoptive transfer into MYC-driven T-lymphoma bearing NSG recipients.** Validation of purity of NK cells isolated by magnetic activated cell sorting (MACS) by flow cytometry for surface CD3, NKp46 and CD49b.

**Supplementary Figure 30:** *Oncogenic MYC suppresses NK cell-mediated immune surveillance of lymphoid malignancies.*

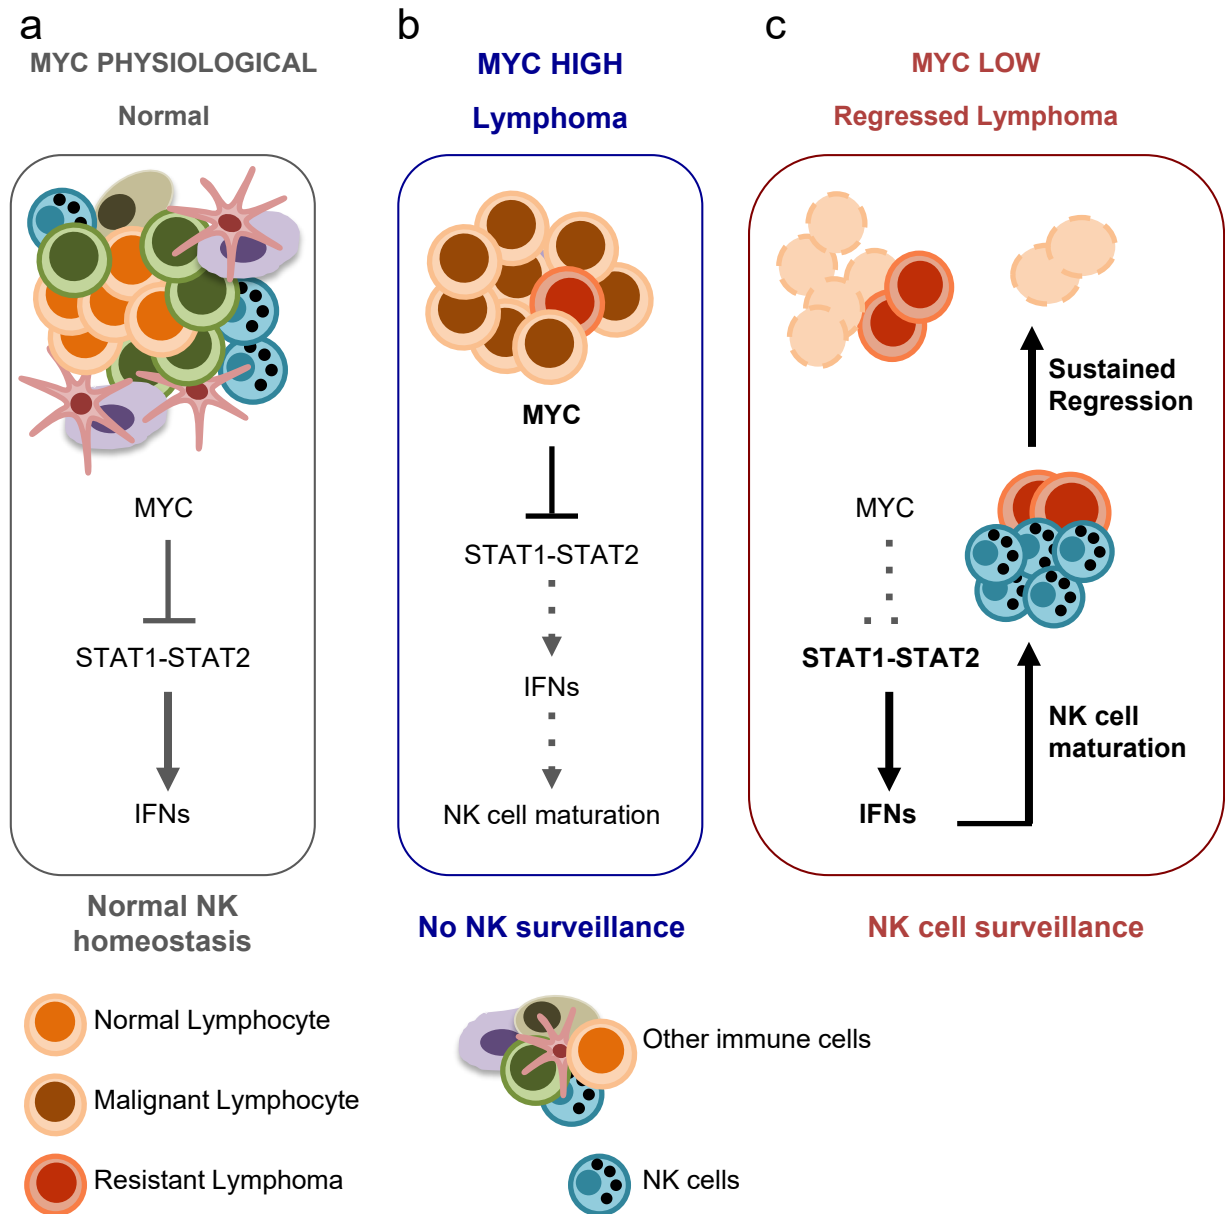

**Supplementary Figure 30: Oncogenic MYC suppresses NK cell-mediated immune surveillance of lymphoid malignancies.** (a) Normal distribution of splenic immune compartments in the absence of lymphoma. (b) MYC-induced lymphomagenesis is associated with the modulation of cytokines and immune subsets in the tumor microenvironment. Activation of oncogenic MYC reduces the secretion of anti-lymphomagenic cytokines, such as Type I IFNs. The altered cytokine milieu excludes NK cells reducing immune surveillance of the lymphoma. (c) MYC inactivation triggers Type I IFN secretion by the lymphoma and NK-mediated immune surveillance. Hyperactivated signaling arms under each condition are depicted in bold black.

**Supplementary Figure 31: Gating strategy for CyTOF and flow cytometry**

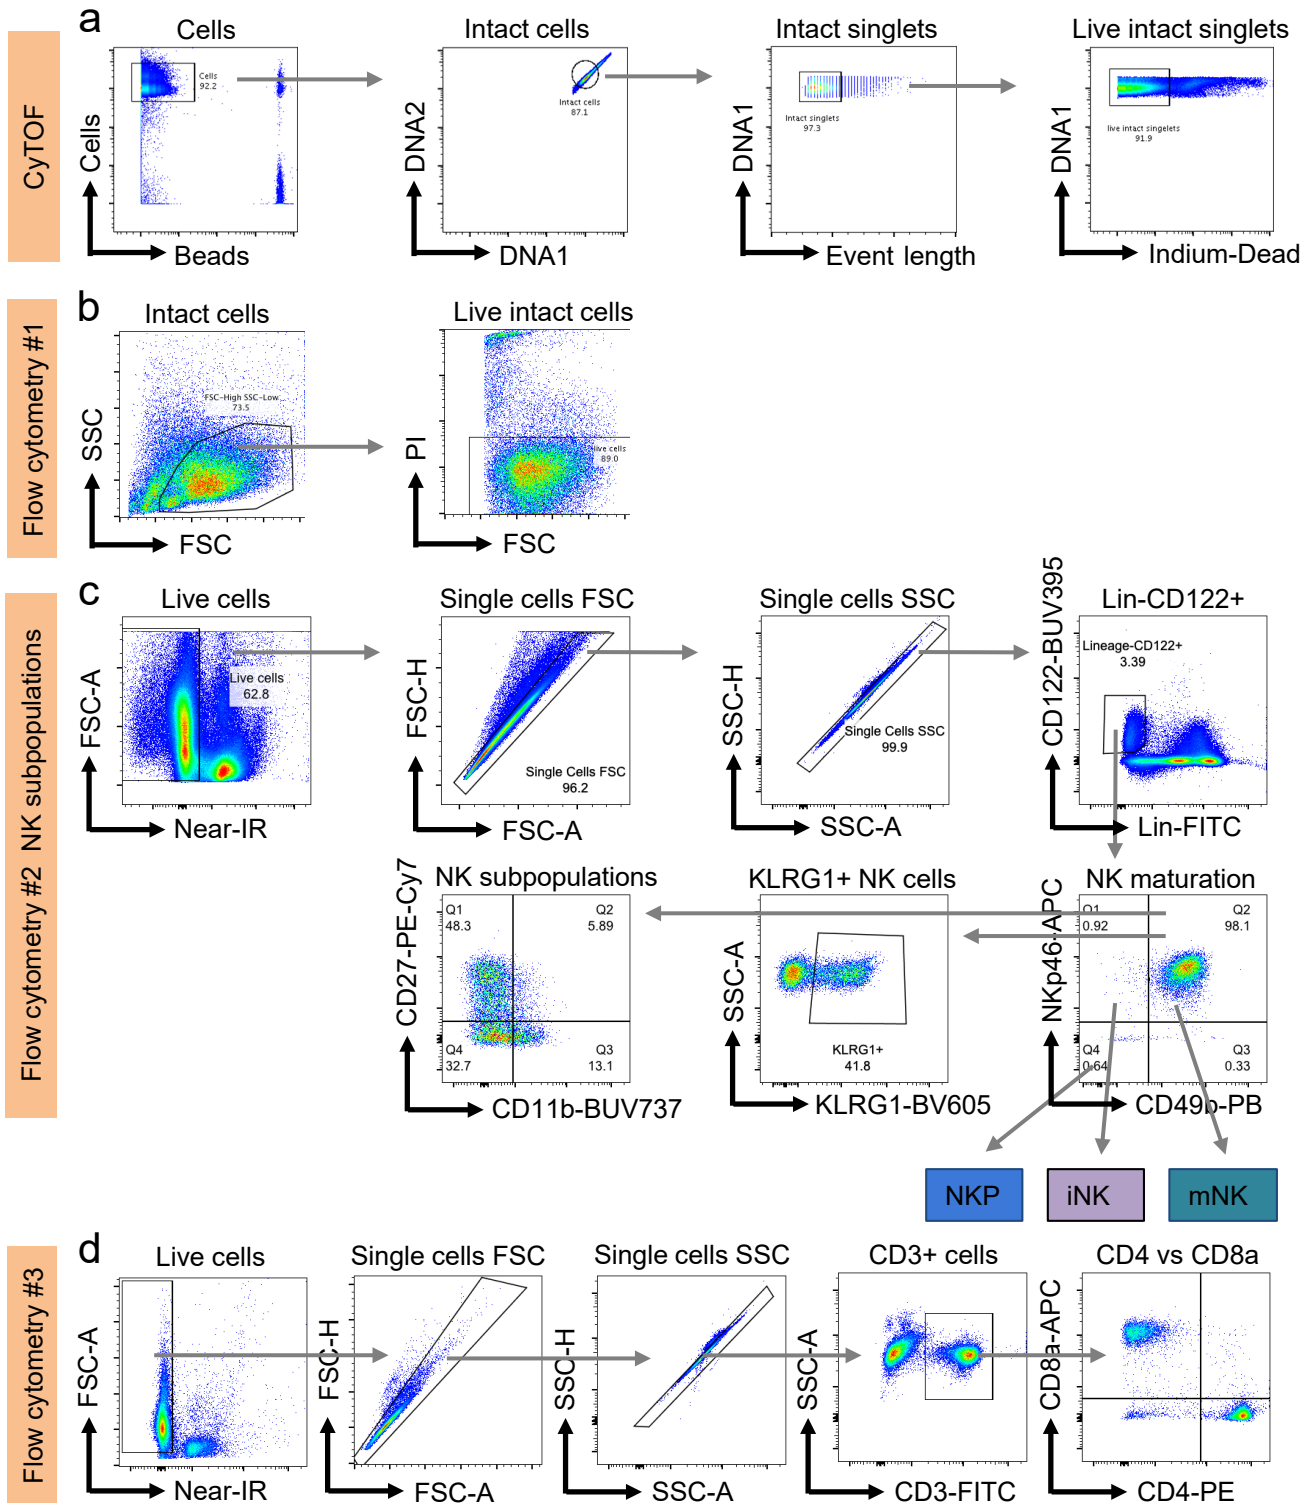

**Supplementary Figure 31: Gating strategy for CyTOF and flow cytometry.** (a) Dot-plot showing the gating strategy for CyTOF data in Figure 1 and 5b and Supplementary Figure 2, 3, 7, and 8. (b) Dot-plots showing the flow cytometry gating strategy used for Figure 2 and Supplementary Figure 5, 15, 20, and 25. (c) Dot-plot showing the flow cytometry gating strategy used for analysis of NK maturation in Figure 3a-i, and 4h-i, and Supplementary Figure 9, 10, 12, and 16. (d) Dot-plots showing the flow cytometry gating strategy used in Supplementary Figure 11. All flow cytometry gating strategies show a representative spleen sample.

e

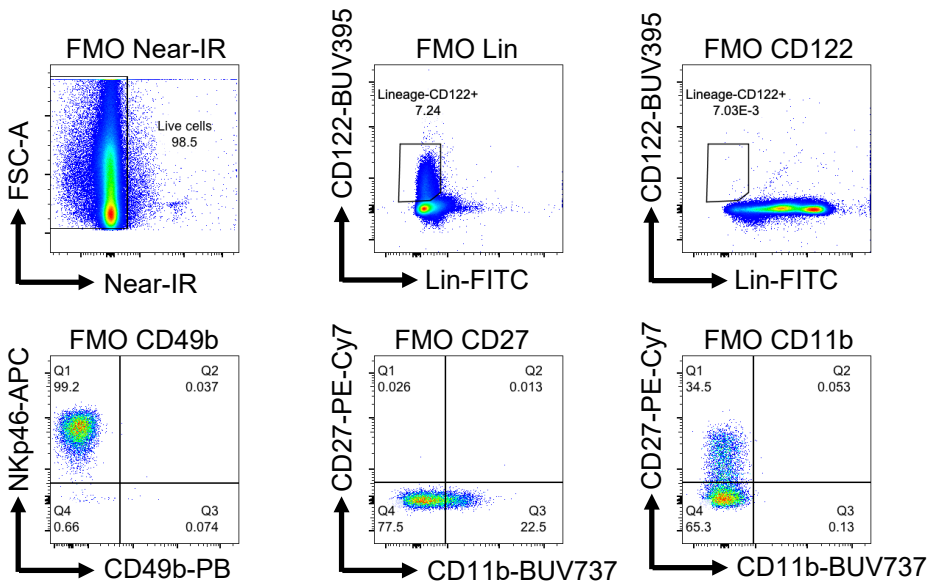

**Supplementary Figure 31 contd.: FMO controls for gating of NK subpopulations.** Dot-plots showing the fluorescence-minus-one (FMO) control samples used for setting the boundaries between “negative” and “positive” for gating of NK subpopulations.

**Supplementary Table 1:** *Antibodies used for CyTOF immunophenotyping (mouse)*

| <b>Antigen</b>     | <b>Metal Tag</b> | <b>Dilution</b> | <b>Source</b>             |
|--------------------|------------------|-----------------|---------------------------|
| Live-Dead          | In115            | 1:50            | HIMC, Stanford University |
| Ly6G               | Pr141            | 1:50            | Fluidigm Corporation      |
| CD11c              | Nd142            | 1:50            | Fluidigm Corporation      |
| CD11b              | Nd143            | 1:50            | Fluidigm Corporation      |
| Ly6C               | Dy162            | 1:50            | Fluidigm Corporation      |
| CD3                | Sm152            | 1:50            | Fluidigm Corporation      |
| CD8a               | Er168            | 1:50            | Fluidigm Corporation      |
| CD4                | Nd145            | 1:50            | Fluidigm Corporation      |
| TCR $\gamma\delta$ | Tb159            | 1:50            | Fluidigm Corporation      |
| TCR $\beta$        | Tm169            | 1:50            | Fluidigm Corporation      |
| CD19               | Sm149            | 1:50            | Fluidigm Corporation      |
| MHCII              | Yb174            | 1:50            | Fluidigm Corporation      |
| NKp46              | Eu153            | 1:50            | Fluidigm Corporation      |
| CD49b              | Er170            | 1:50            | Fluidigm Corporation      |
| Ter119             | Sm154            | 1:50            | Fluidigm Corporation      |

**Supplementary Table 2:** *Antibodies used for Phospho-CyTOF (human)*

| <b>Antigen</b>  | <b>Metal Tag</b> | <b>Dilution</b> | <b>Source</b>  |
|-----------------|------------------|-----------------|----------------|
| Live-Dead       | In115            | 1:50            | HIMC, Stanford |
| Ly6G            | Pr141            | 1:50            | HIMC, Stanford |
| CD19            | Nd142            | 1:50            | HIMC, Stanford |
| CD117           | Nd143            | 1:50            | HIMC, Stanford |
| CD11b           | Nd144            | 1:50            | HIMC, Stanford |
| CD4             | Nd145            | 1:50            | HIMC, Stanford |
| CD20            | Sm147            | 1:50            | HIMC, Stanford |
| CD7/ CD45RO     | Sm149            | 1:50            | HIMC, Stanford |
| CD123           | Eu151            | 1:50            | HIMC, Stanford |
| CD27            | Sm152            | 1:50            | HIMC, Stanford |
| CD45RA          | Eu153            | 1:50            | HIMC, Stanford |
| CD45            | Sm154            | 1:50            | HIMC, Stanford |
| pP38            | Gd156            | 1:50            | HIMC, Stanford |
| CD24            | Gd157            | 1:50            | HIMC, Stanford |
| pSTAT3          | Gd158            | 1:50            | HIMC, Stanford |
| CD11c           | Tb159            | 1:50            | HIMC, Stanford |
| CD14            | Gd160            | 1:50            | HIMC, Stanford |
| IgD             | Dy161            | 1:50            | HIMC, Stanford |
| pERK1/2         | Dy162            | 1:50            | HIMC, Stanford |
| I $\kappa$ Btot | Dy163            | 1:50            | HIMC, Stanford |
| CD25            | Dy164            | 1:50            | HIMC, Stanford |
| pS6             | Ho165            | 1:50            | HIMC, Stanford |
| CD16            | Er166            | 1:50            | HIMC, Stanford |
| CD38            | Er167            | 1:50            | HIMC, Stanford |
| CD8             | Er168            | 1:50            | HIMC, Stanford |
| pSTAT1          | Tm169            | 1:50            | HIMC, Stanford |
| CD3             | Er170            | 1:50            | HIMC, Stanford |
| pSTAT5          | Yb172            | 1:50            | HIMC, Stanford |
| pPLC $\gamma$ 2 | Yb173            | 1:50            | HIMC, Stanford |
| HLADR           | Yb174            | 1:50            | HIMC, Stanford |
| CD56            | Lu175            | 1:50            | HIMC, Stanford |
| CD127           | Yb176            | 1:50            | HIMC, Stanford |



**Supplementary Table 3:** *Antibodies used for flow cytometry*

| Surface Antigen      | Fluorophore          | Clone ID  | Dilution | Source        |
|----------------------|----------------------|-----------|----------|---------------|
| CD3 $\epsilon$       | FITC                 | 145-2C11  | 1:200    | BD Pharmingen |
| CD4                  | PE                   | RM4-5     | 1:100    | BD Pharmingen |
| CD8 $\alpha$         | APC                  | 53-6.7    | 1:200    | BD Pharmingen |
| CD11b                | BUV737               | M1/70     | 1:300    | BD Optibuild  |
| CD19                 | FITC                 | 1D3/CD19  | 1:500    | BioLegend     |
| CD27                 | PE-Cy7               | LG.3A10   | 1:500    | BioLegend     |
| CD49b                | Pacific Blue         | DX5       | 1:200    | BioLegend     |
| CD122                | BUV395               | TM-B1     | 1:100    | BD Optibuild  |
| CD335 (NKp46)        | APC                  | 29A1.4    | 1:100    | BioLegend     |
| KLRG1                | Brilliant Violet 605 | 2F1/KLRG1 | 1:100    | BioLegend     |
| NKG2D                | PE                   | 1D11      | 1:200    | BD Pharmingen |
| TCR- $\beta$         | FITC                 | H57-597   | 1:200    | eBioscience   |
| CD16/CD32 (Fc block) | -                    | 2.4G2     | 1:50     | BD Pharmingen |
| Live/dead            | Near-IR              | -         | 1:10,000 | Thermo Fisher |

**Supplementary Table 4:** *Antibodies used for immunoblotting*

| <b>Antigen</b>     | <b>Clone ID</b> | <b>Dilution</b> | <b>Source</b>             |
|--------------------|-----------------|-----------------|---------------------------|
| MYC                | N-262           | 1:1000          | Santa Cruz Biotechnology  |
| ACTB               | ab8227          | 1:10,000        | Abcam                     |
| STAT1              | 9172            | 1:1000          | Cell Signaling Technology |
| Phospho S727 STAT1 | 9177            | 1:1000          | Cell Signaling Technology |
| STAT2              | D9J7L           | 1:1000          | Cell Signaling Technology |

**Supplementary Table 5:** *Lentiviral and retroviral vectors used in the study*

| <b>Vector</b>              | <b>Type</b> | <b>Source</b>        |
|----------------------------|-------------|----------------------|
| pMSCV Luciferase IRES-puro | Retroviral  | Addgene              |
| pRRL                       | Lentiviral  | Lab of Martin Eilers |
| pRRL hMYC                  | Lentiviral  | Lab of Martin Eilers |
| pRRL hMYC V394D            | Lentiviral  | Lab of Martin Eilers |

Transfections of the above retroviral constructs were performed as discussed in the online methods section.

**Supplementary Table 6:** *Sequences of oligonucleotide primers used for quantitative PCR*

**Mouse primers**

|          |                             |
|----------|-----------------------------|
| mIFNA2_F | 5'-AAGGTCCTGGCACAGATGAG-3'  |
| mIFNA2_R | 5'-GGAGGGTTGTATTCCAAGCA-3'  |
| mSTAT1_F | 5'-TGGTGAAATTGCAAGAGCTG-3'  |
| mSTAT1_R | 5'-CAGACTTCCGTTGGTGGATT-3'  |
| mSTAT2_F | 5'-GCCTCCATTCTCTGGTTCAA-3'  |
| mSTAT2_R | 5'-TCCTCCATCTTGCAGCTCTT-3'  |
| mUBC_F   | 5'-AGCCCAGTGTTACCACCAAG-3'  |
| mUBC_R   | 5'-ACCCAAGAACAAGCACAAAGG-3' |

**Human primers**

|          |                              |
|----------|------------------------------|
| hIFNA2_F | 5'-GCAAGTCAAGCTGCTCTGTG-3'   |
| hIFNA2_R | 5'-CAAACCTCCTCCTGGGGAAAT-3'  |
| hSTAT1_F | 5'-CCGTTTTTCATGACCTCCTGT-3'  |
| hSTAT1_R | 5'-TGAATATCCCCGACTGAGC-3'    |
| hSTAT2_F | 5'-GGAACAGCTGGAGACATGGT-3'   |
| hSTAT2_R | 5'-GGCTGGGTTTCTACCACAAA-3'   |
| hMYC_F   | 5'-CTGCGACGAGGAGGAGAACT-3'   |
| hMYC_R   | 5'-GGCAGCAGCTCGAATTTCTT-3'   |
| hUBC_F   | 5'-CTGGAAGATGGTTCGTACCCTG-3' |
| hUBC_R   | 5'-GGTCTTGCCAGTGAGTGTCT-3'   |
